# Supplementary material for: Impeding Glial Scarring Hyperplasia and Activating Axon Neogenesis via Immunomodulatory Microneedle Patch for Spinal Cord Repair
Source: Research Square preprint supplement (doi:10.21203/rs.3.rs-7998029/v1), 2025-11-19
Supplement: Supplementary file 1 [file 51658fa1801cc64b54be0993.docx]

**Impeding Glial Scarring Hyperplasia and Activating Axon Neogenesis via Immunomodulatory Microneedle Patch for Spinal Cord Repair**

Tao Zhoua,b,1, Yajing Lina,b,1, Ying Wangb,1, Lin Lina, Yingji Maoa,b,*, Pinghui Zhoua,b,*

*a Department of Orthopedics and Department of Rehabilitation, Anhui Province Key Laboratory of Tissue Transplantation, The First Affiliated Hospital of Bengbu Medical University, Bengbu 233000, China*

*b Anhui Engineering Research Center for Neural Regeneration Technology and Medical New Materials, Anhui Provincial Key Laboratory of Tumor Evolution and Intelligent Diagnosis and Treatment, School of Life Sciences, Bengbu Medical University, Bengbu 233030, China;*

1 These authors contributed equally to this work.

*Corresponding authors: Correspondence to Yingji Maoor Pinghui Zhou

E-mail addresses: myj123@bbmu.edu.cn (Yingji Mao); zphdoctor@126.com (Pinghui Zhou).


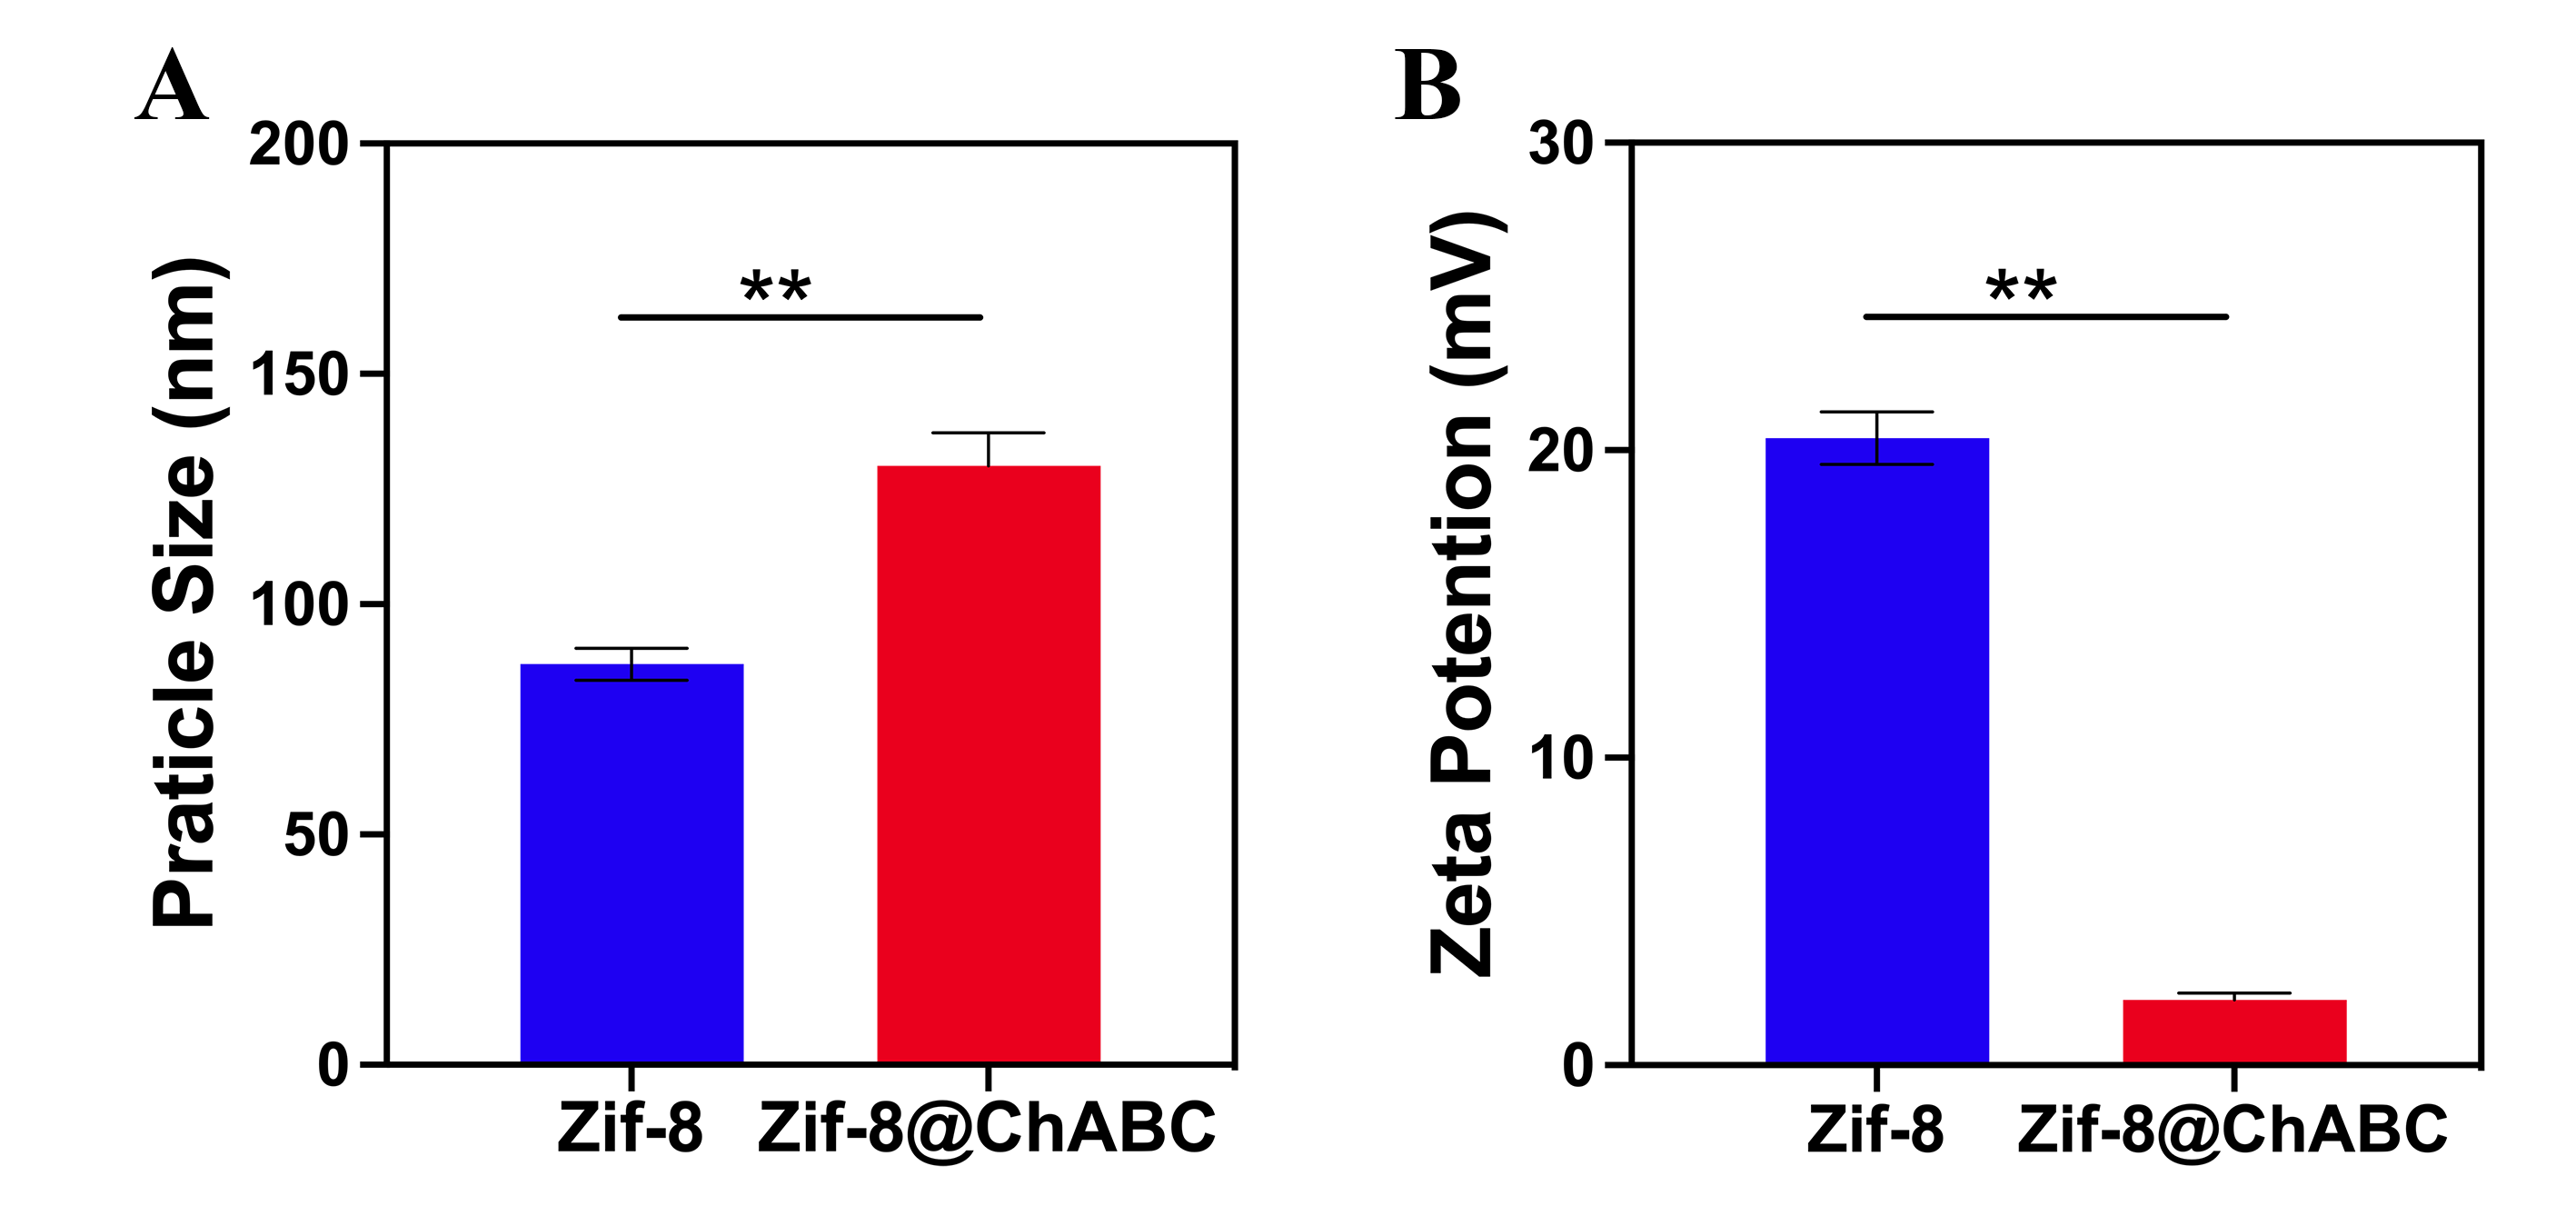


**Fig. S1** Particle size and zeta potential. (A) Particle size. (B) Zeta potential. (n = 3, **P* < 0.05 and ***P* < 0.01, ns: not significant).


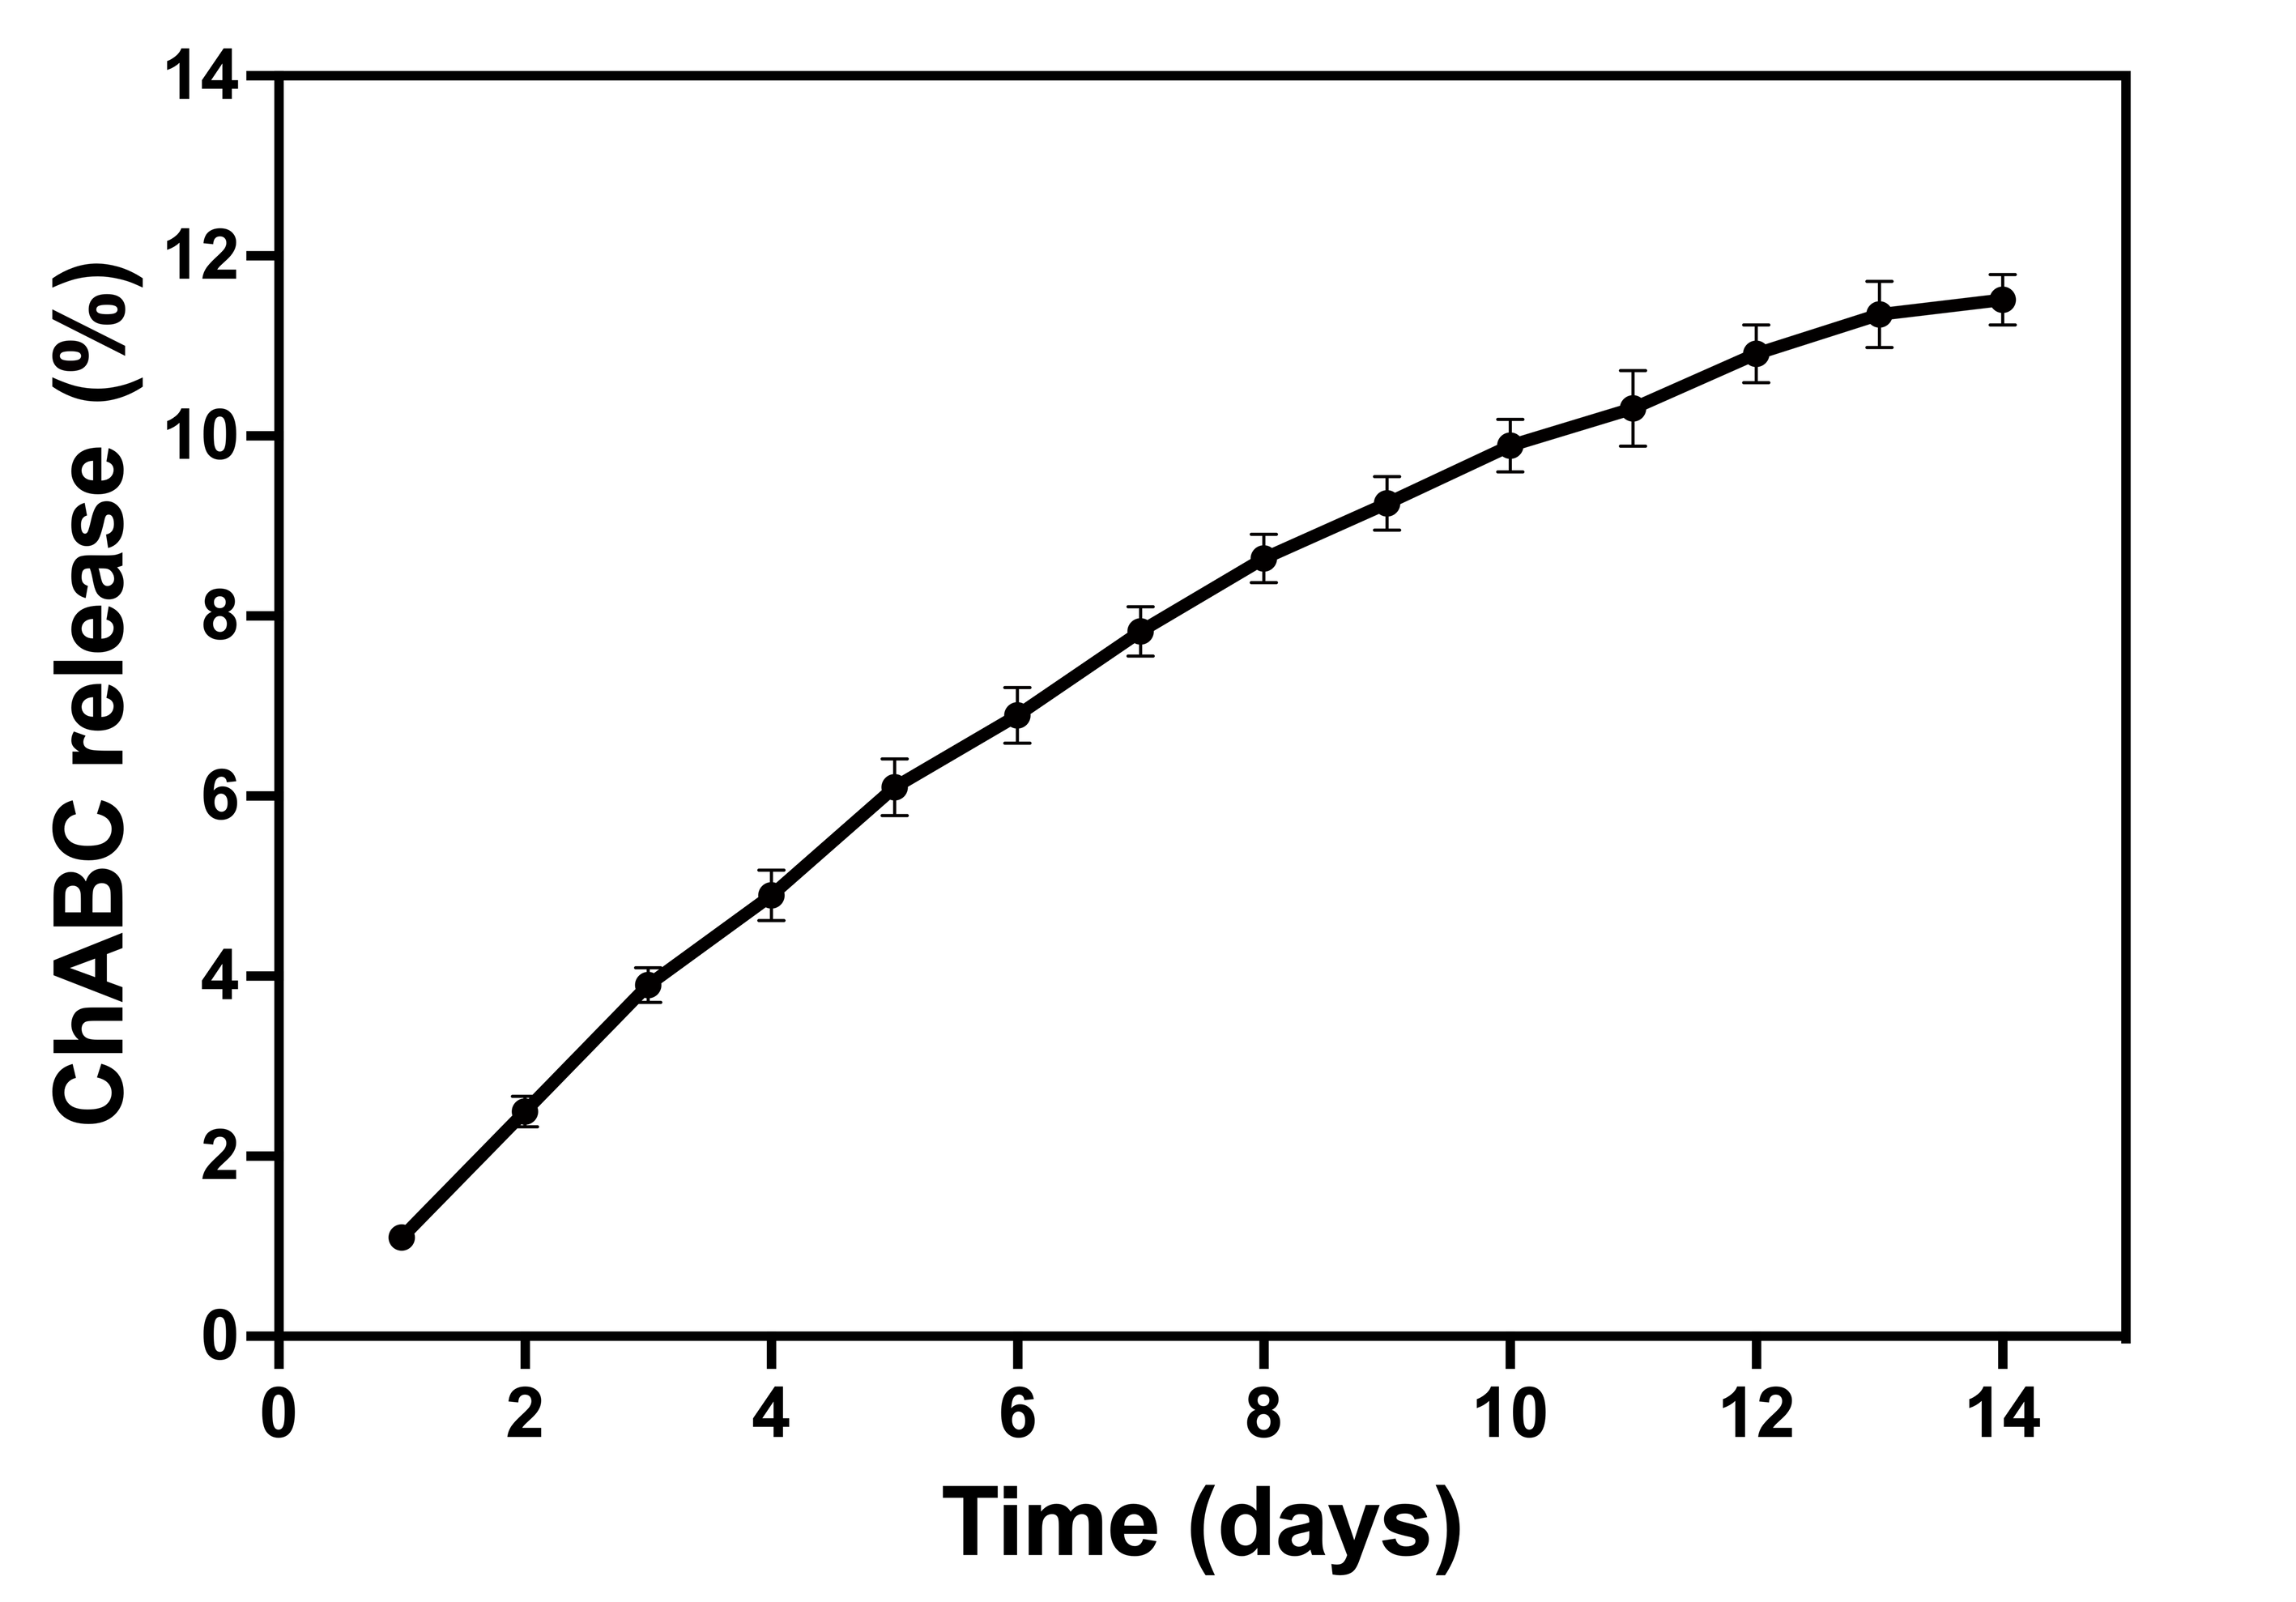


**Fig. S2** Drug release curve of ChABC. (n = 3, **P* < 0.05 and ***P* < 0.01, ns: not significant).


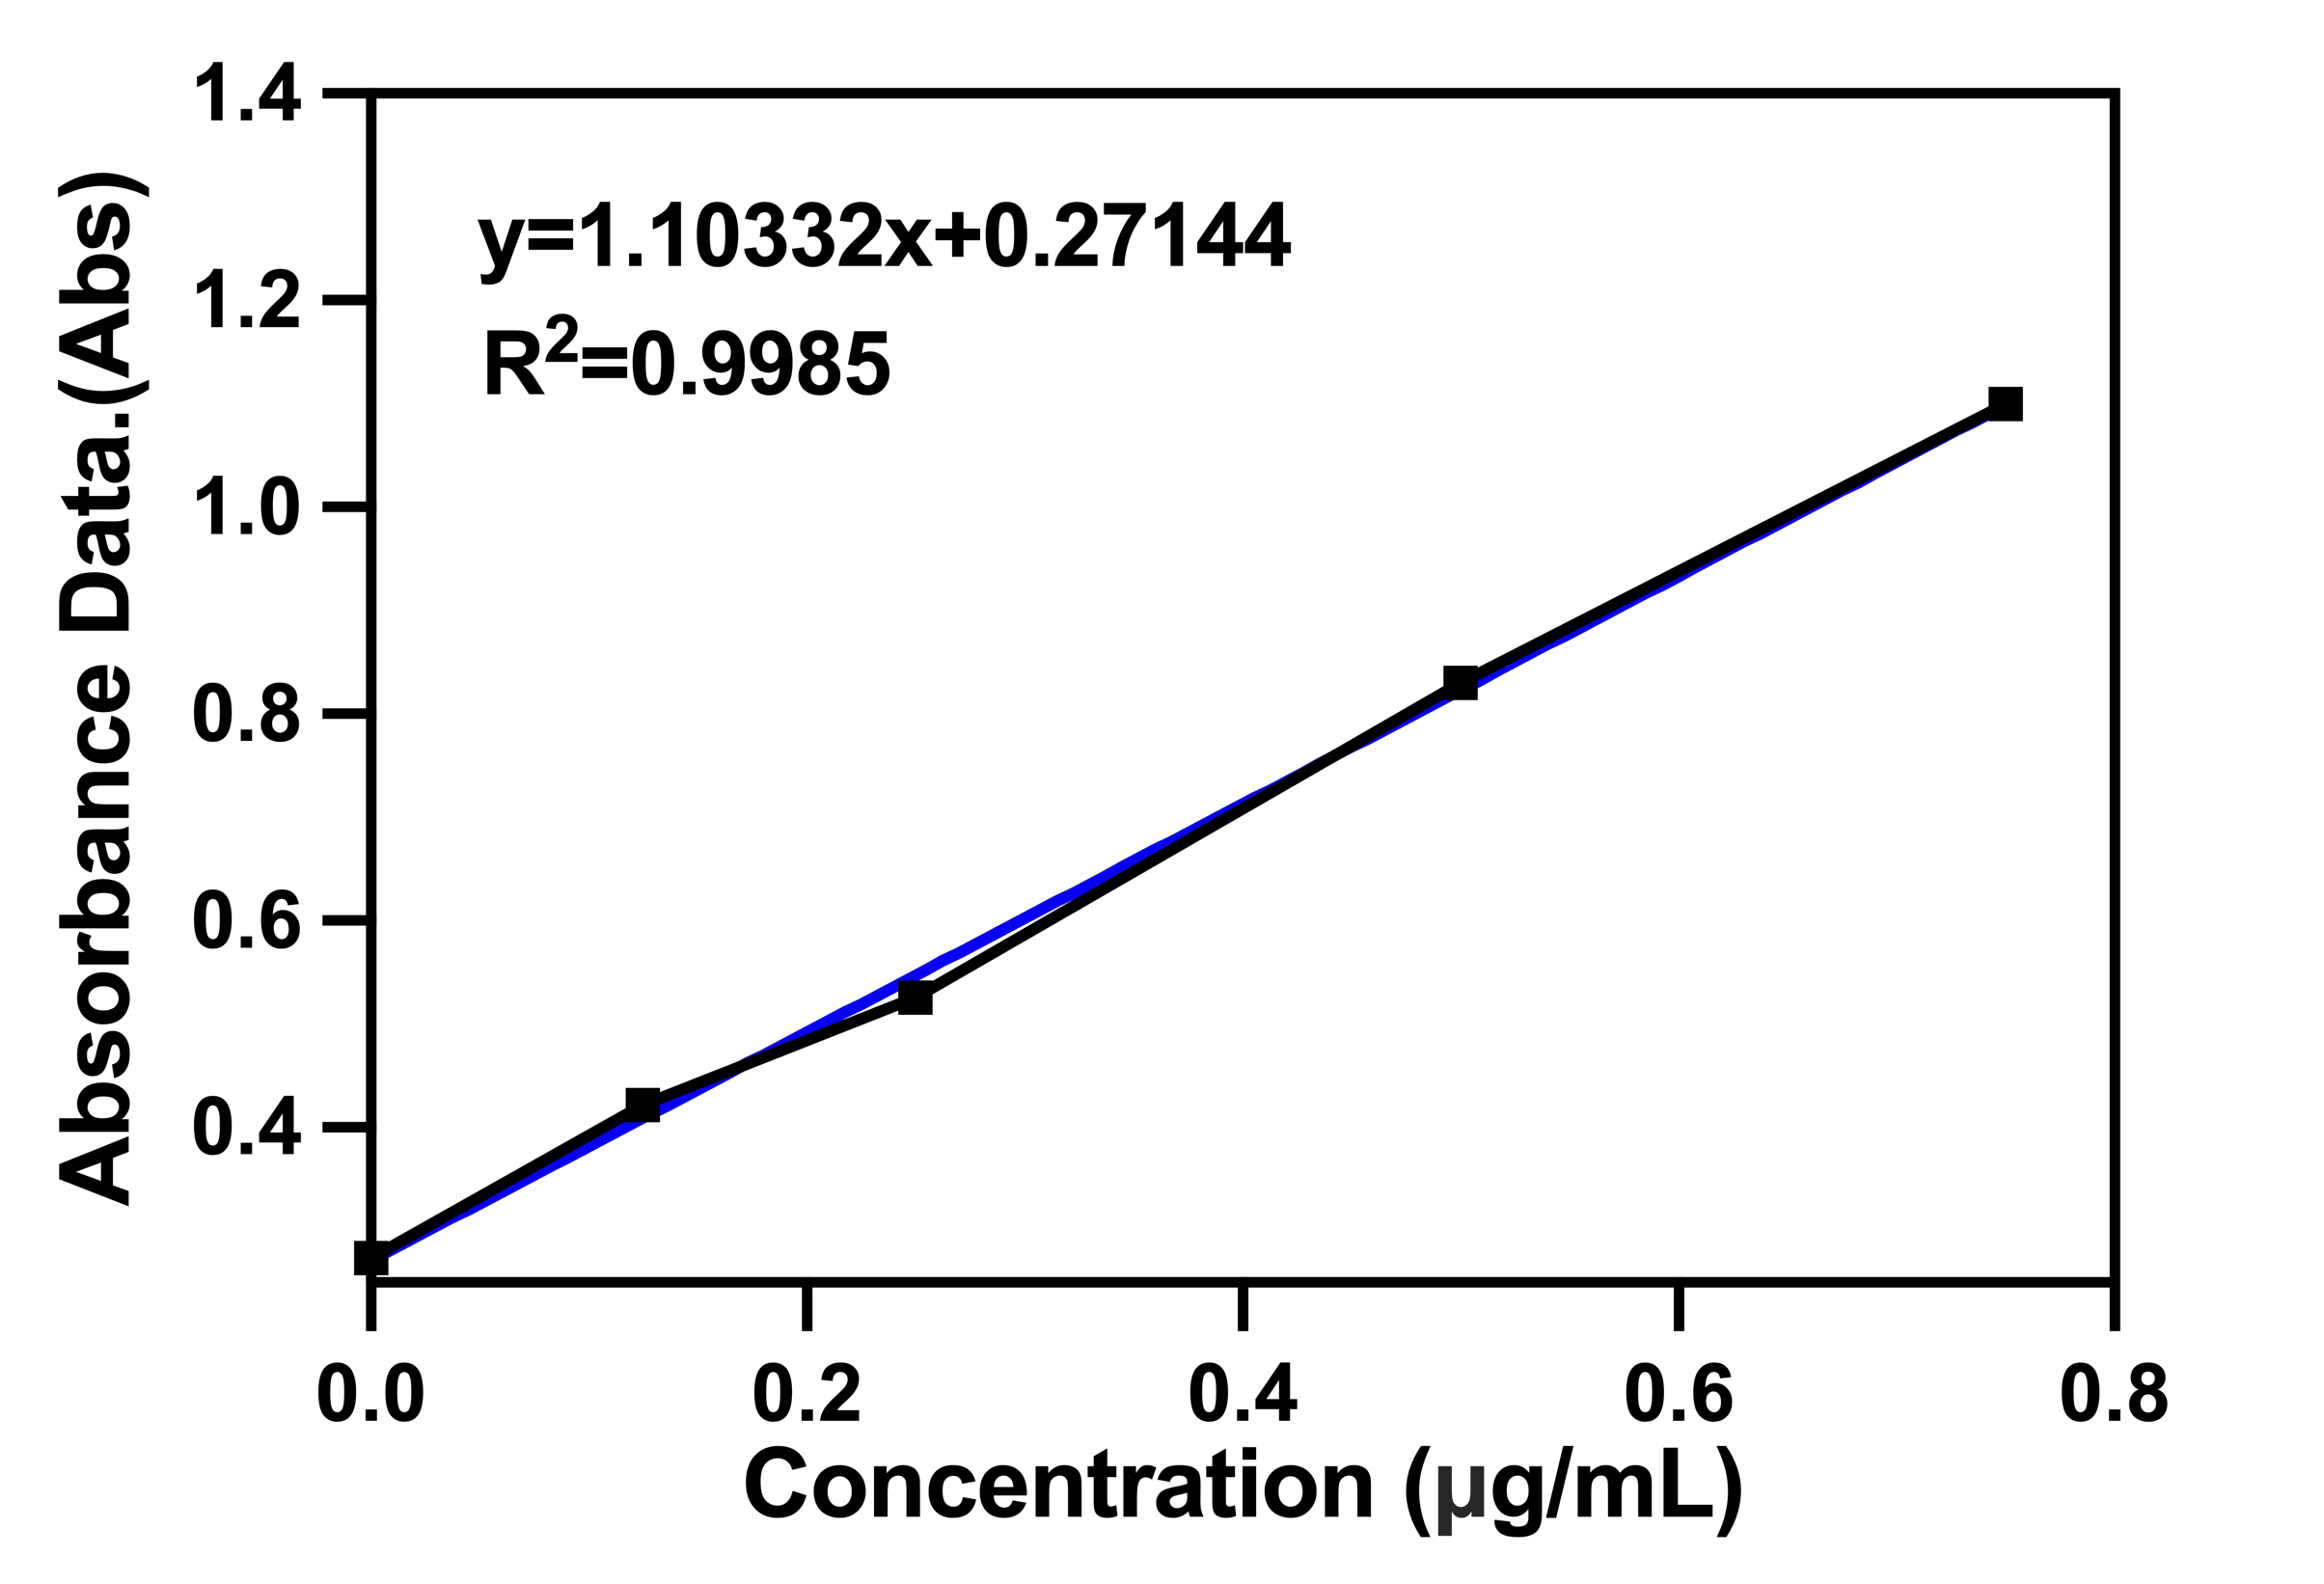


**Fig. S3** UV–vis spectral calibration curve for various ChABC concentrations.


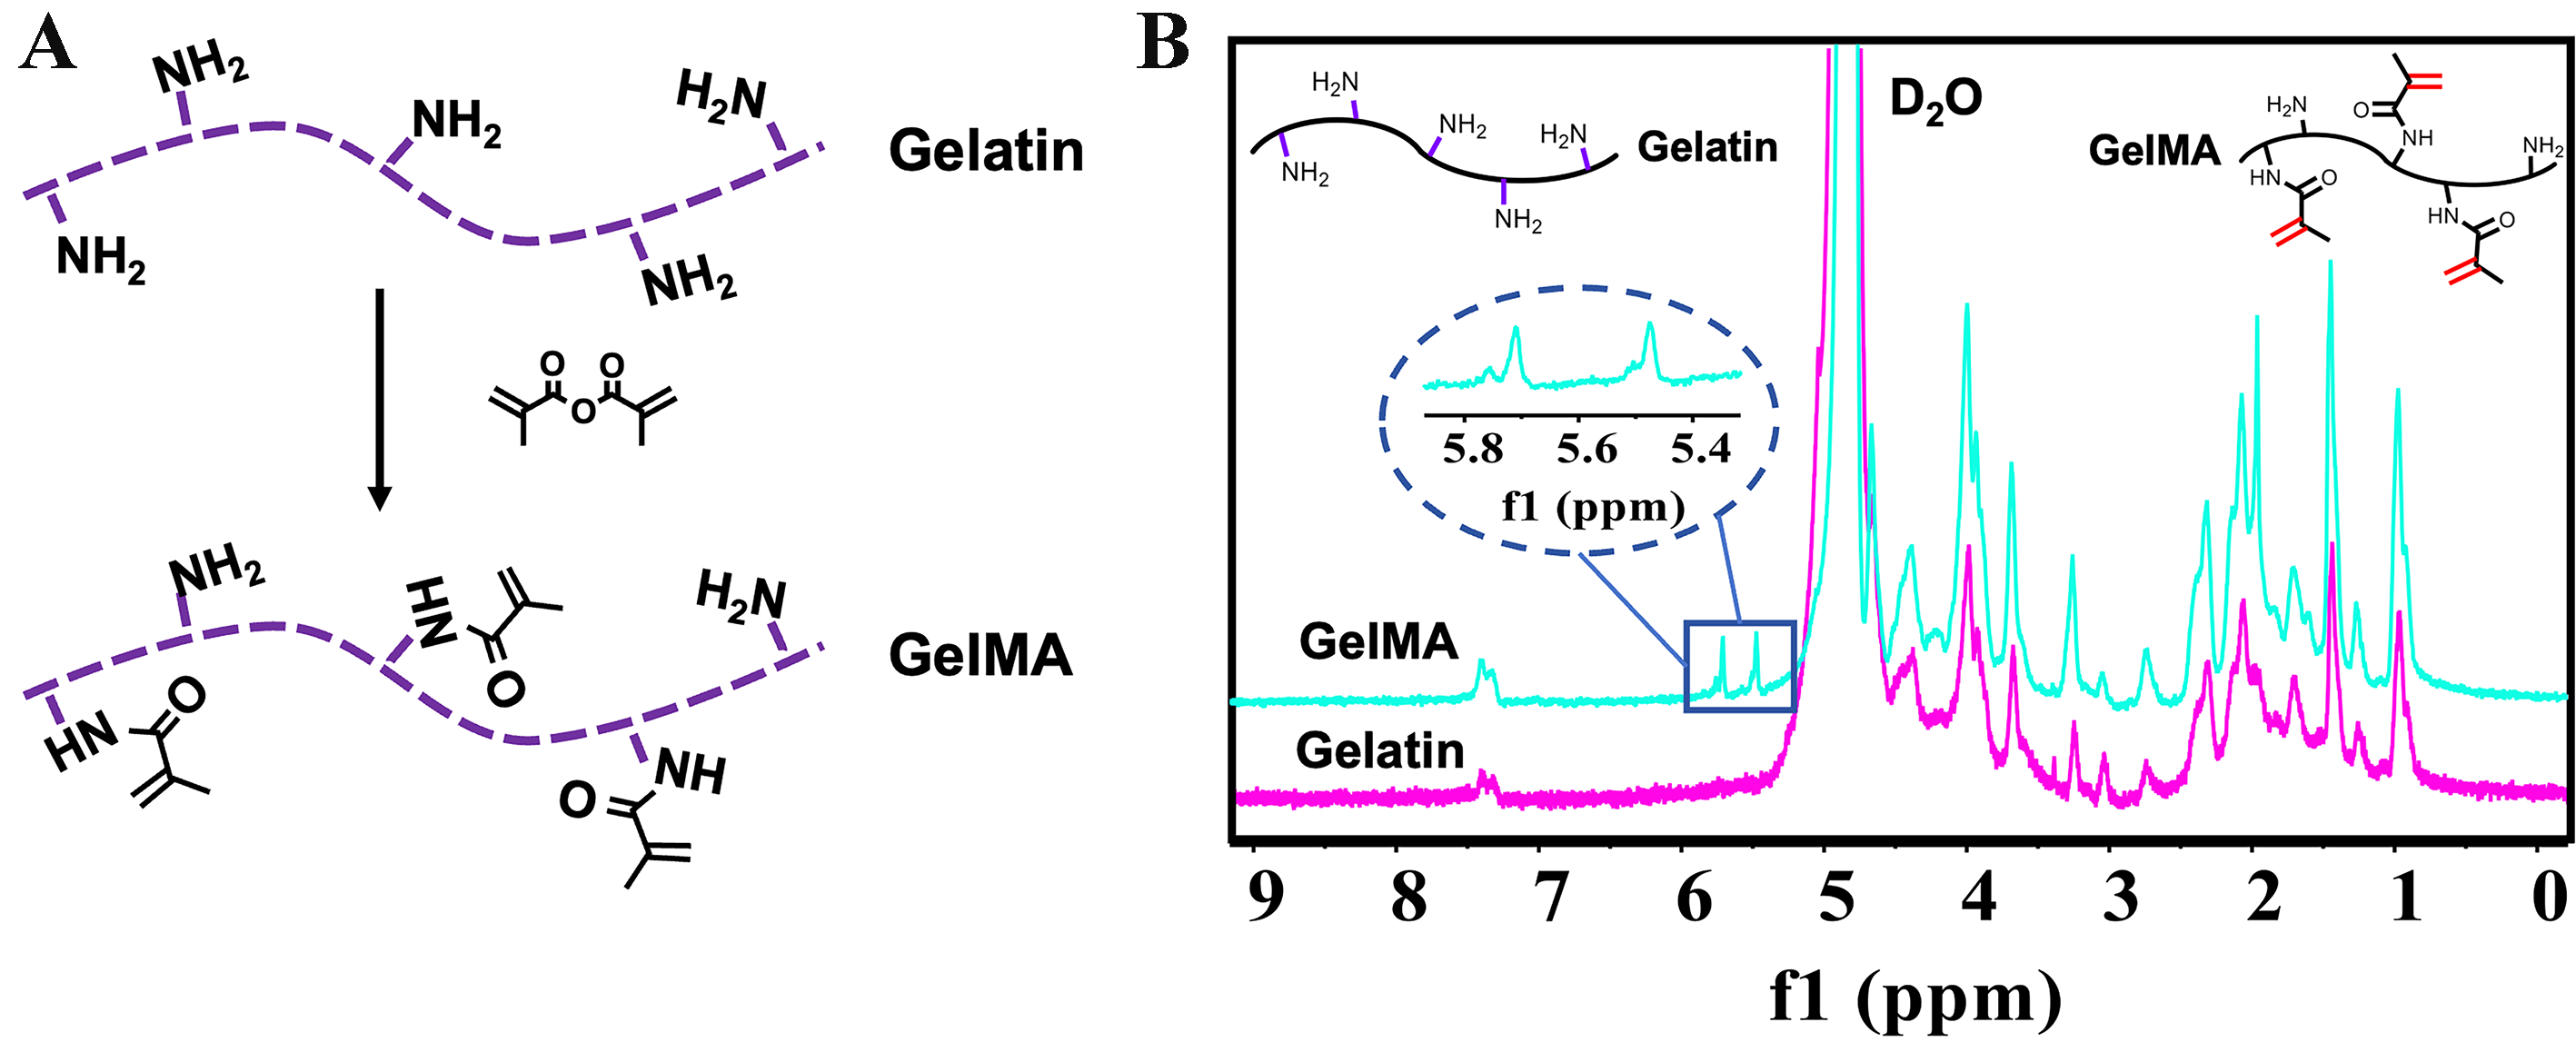


**Fig. S4** The proton nuclear magnetic resonance (1H NMR) spectra of GelMA and gelatin.


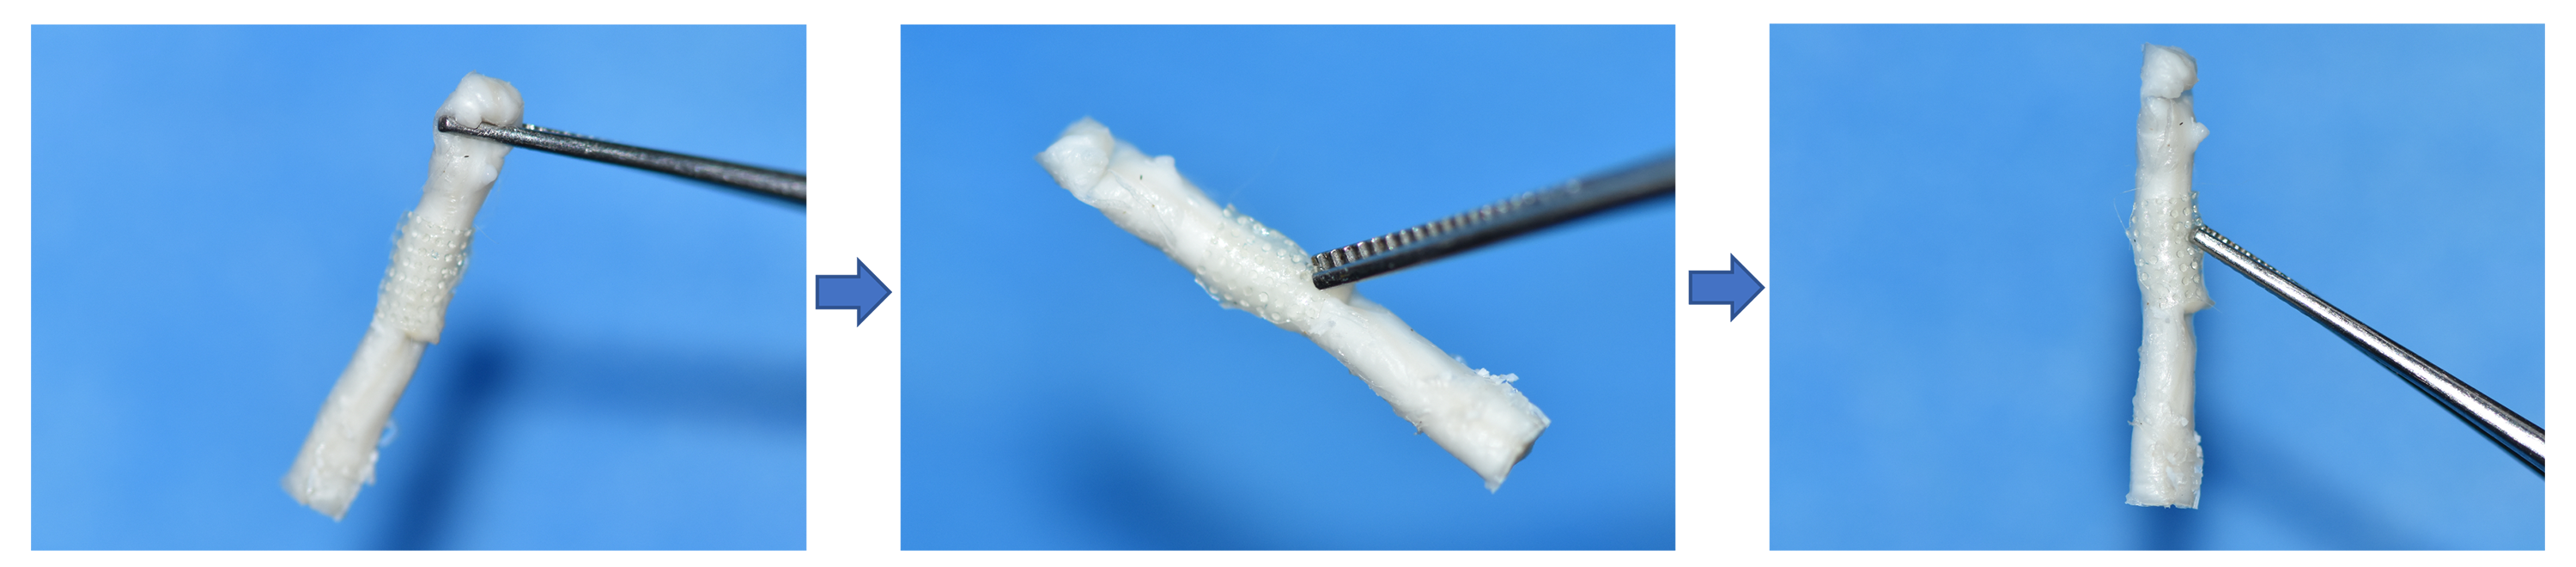


**Fig. S5** Z@C-MN loads on the spinal cord tissue.


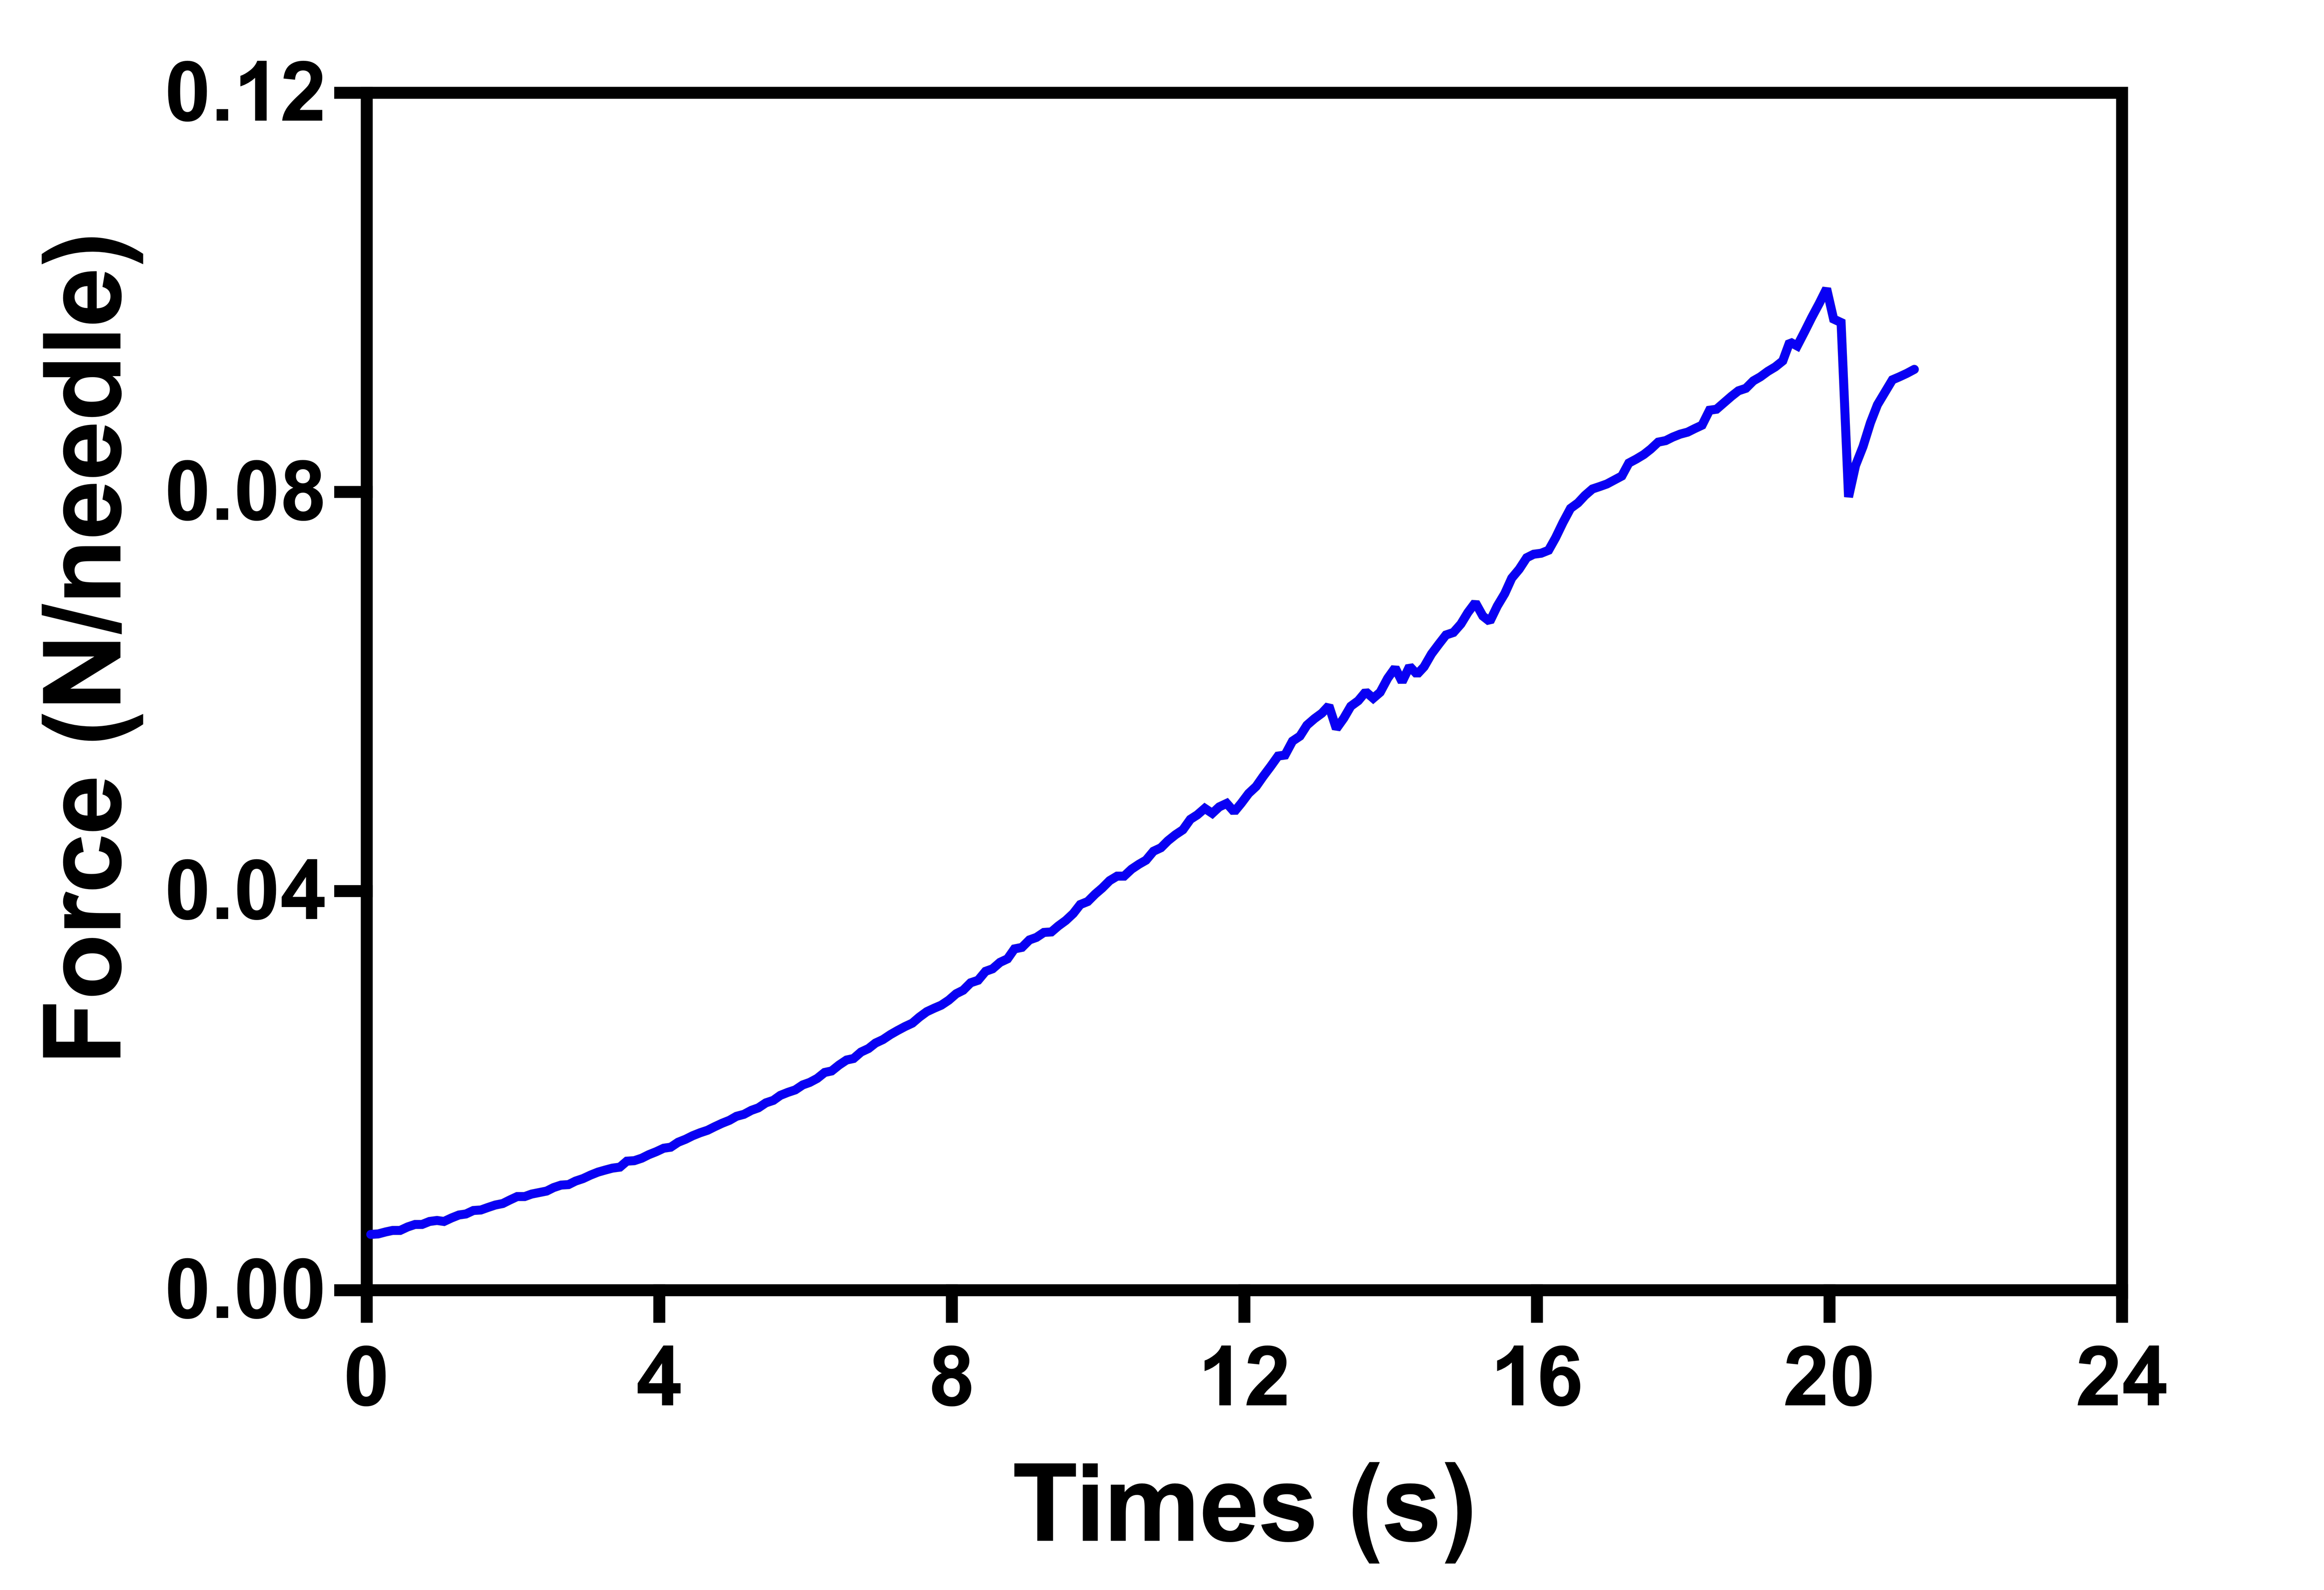


**Fig. S6** Force–times curves of Z@C-MN.


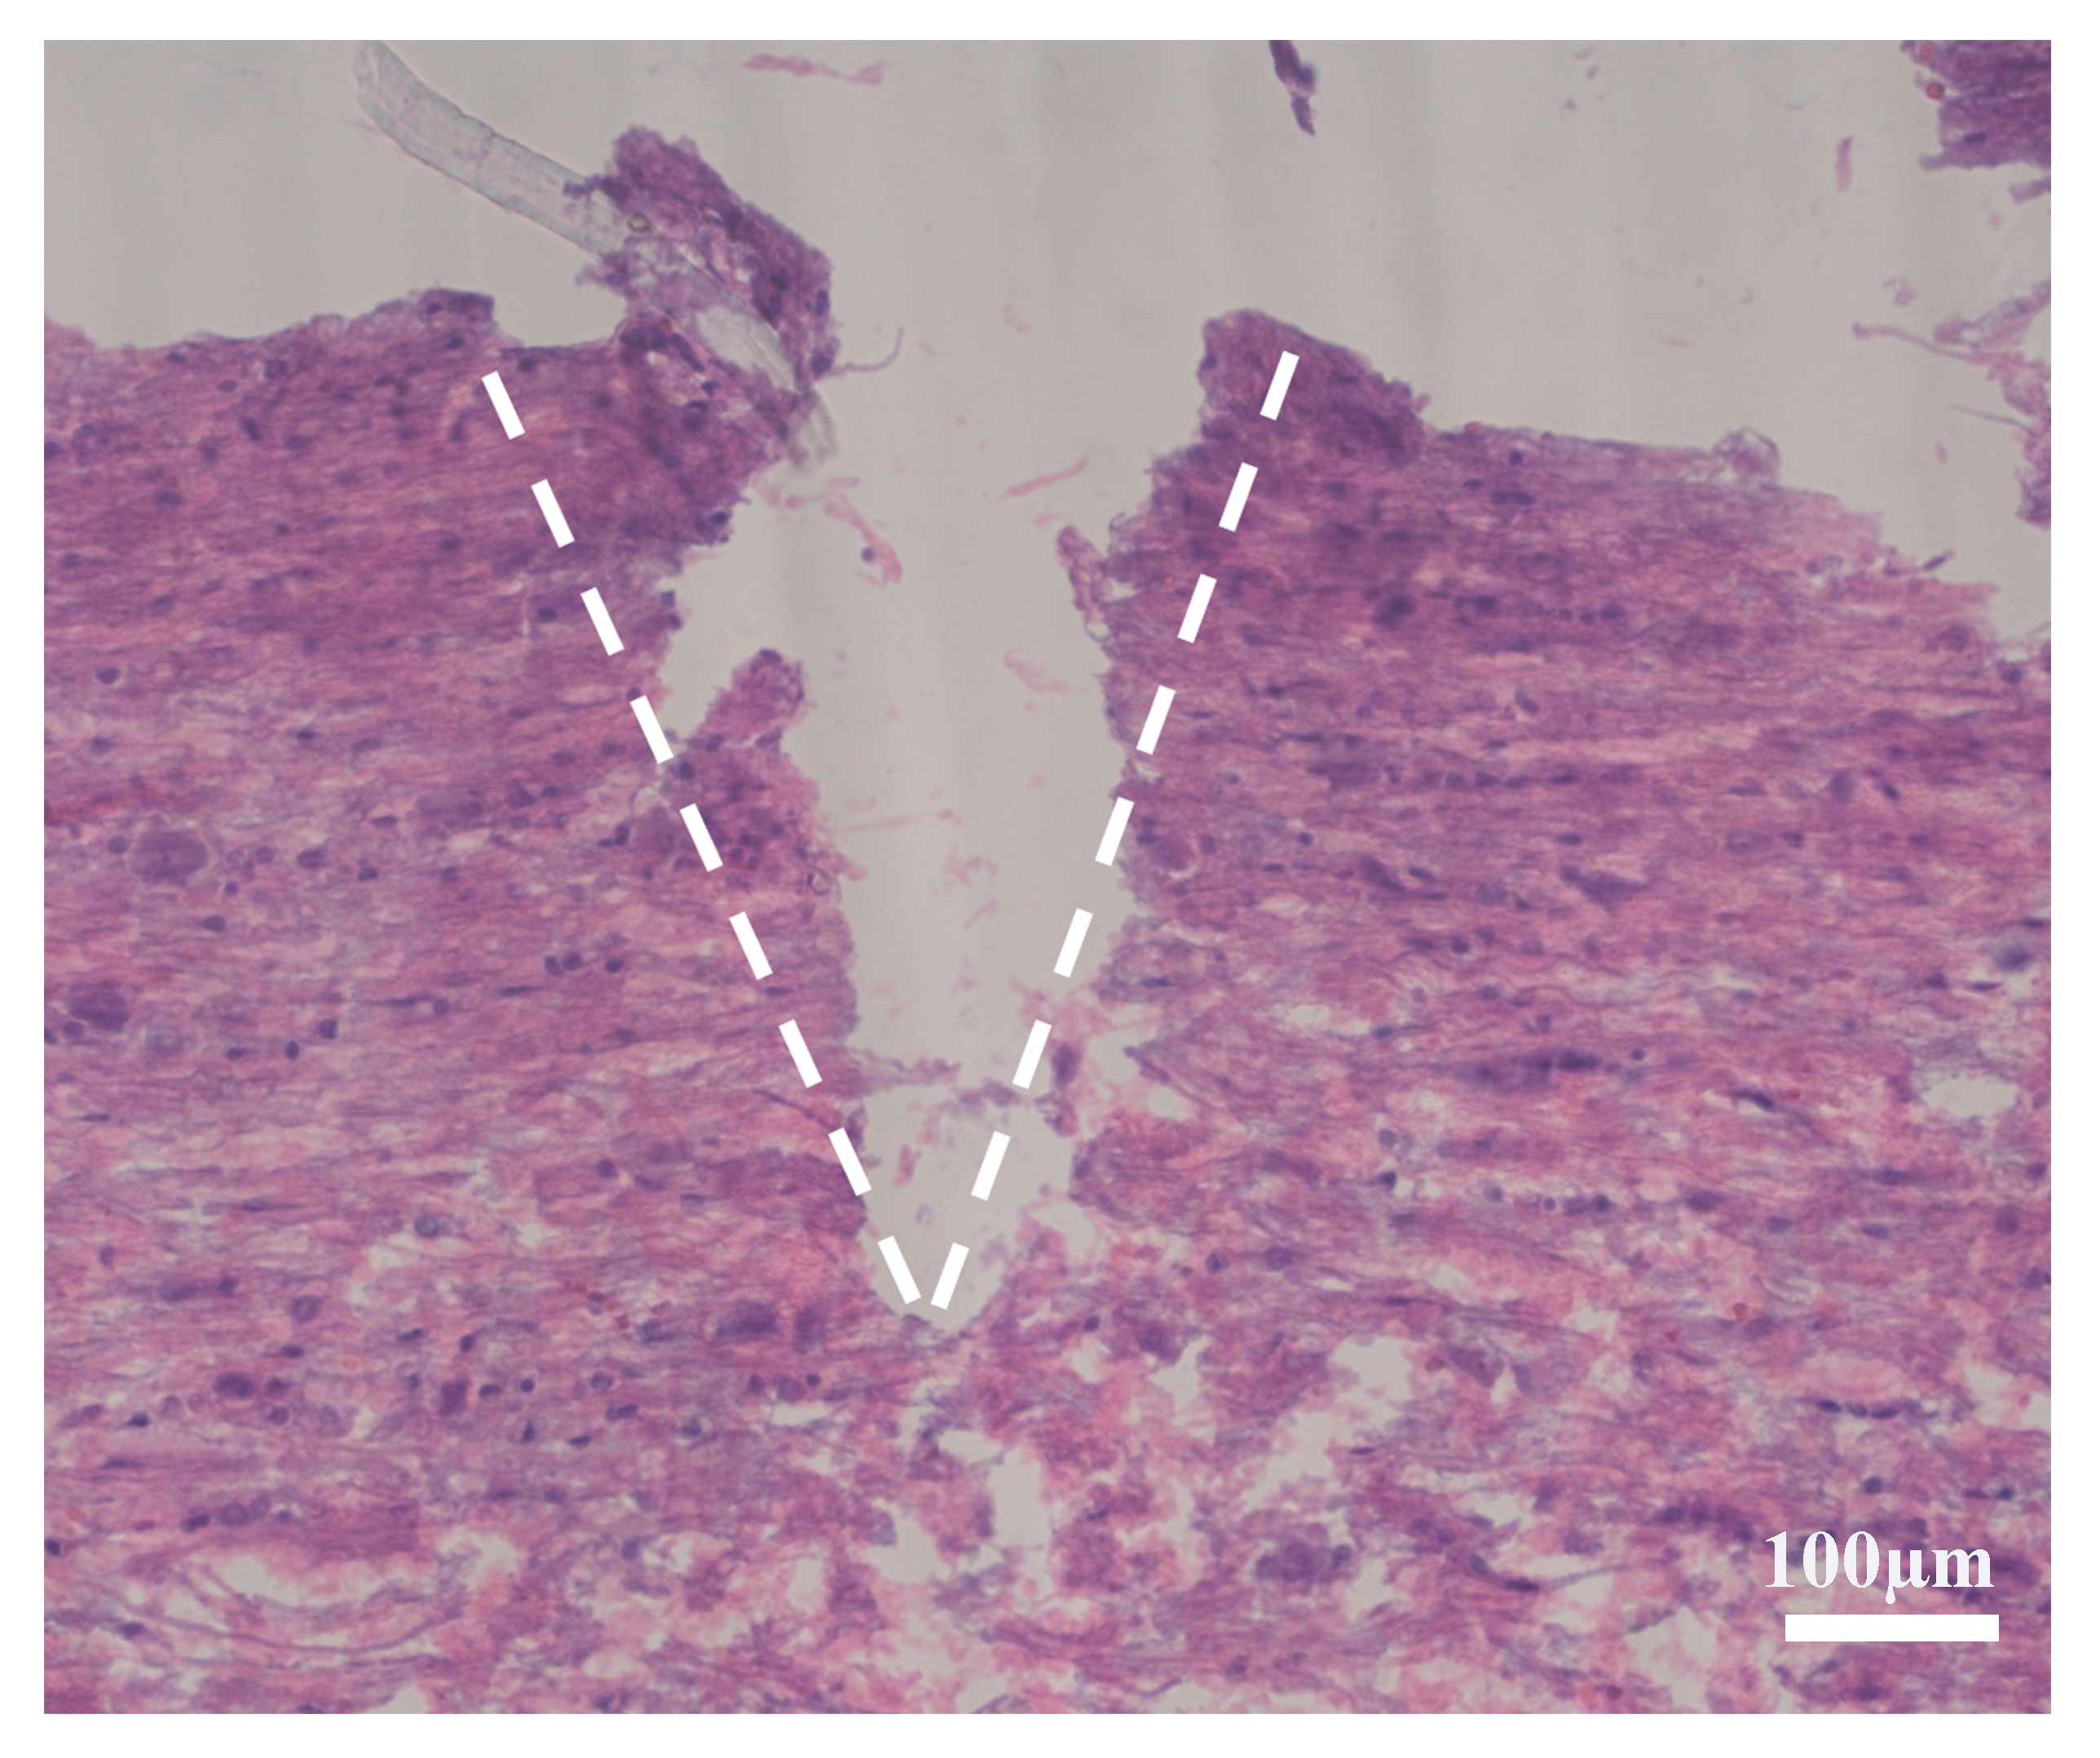


**Fig. S7** HE staining of the spinal cord tissue punctured by Z@C-MN puncture.


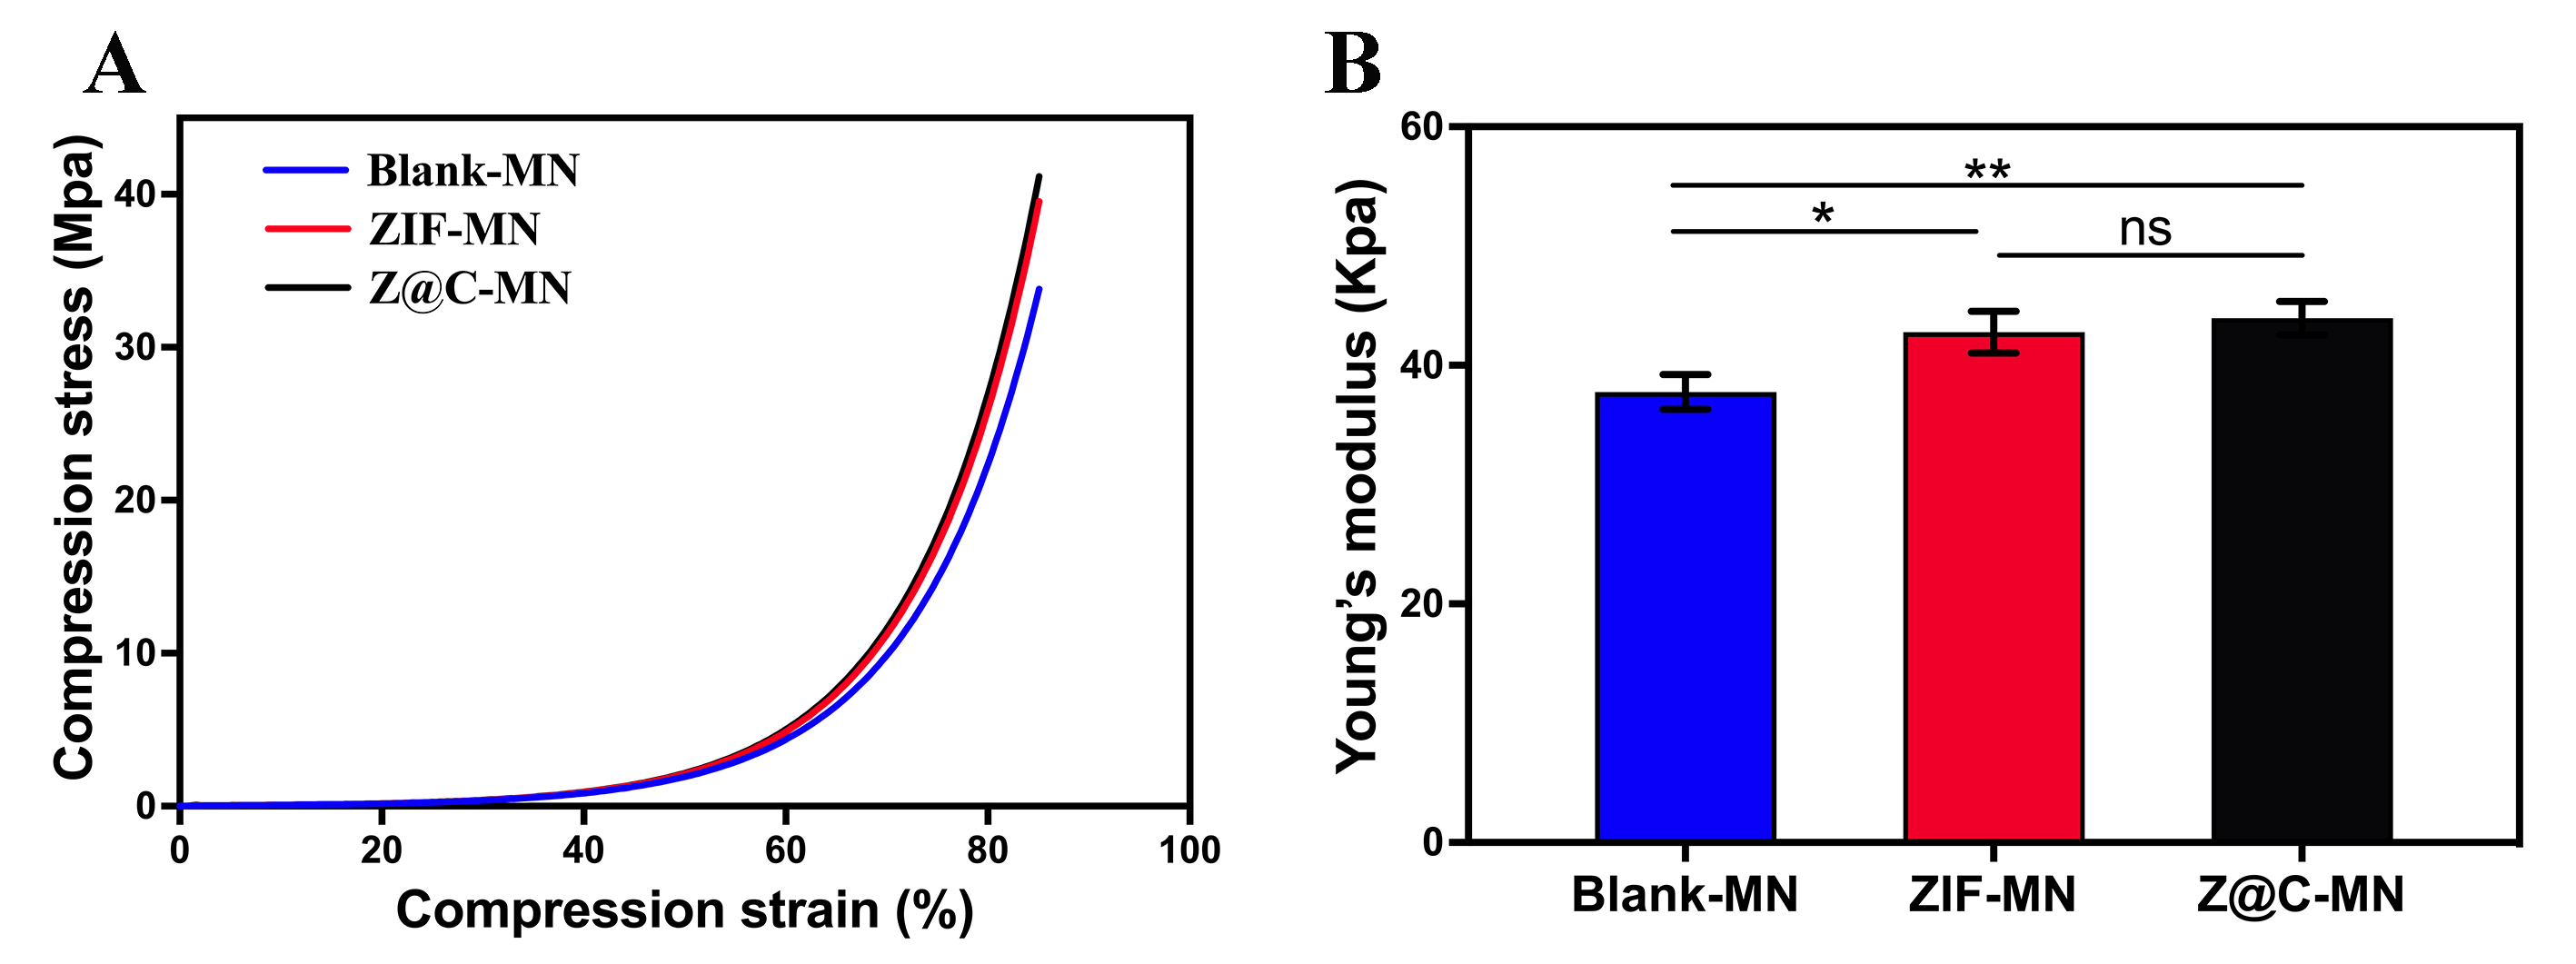


**Fig. S8** Mechanical properties of each group of MNs. (A) Force–displacement curves of Blank-MN, ZIF-MN, and Z@C-MN. (B) Young's modulus of Blank-MN, ZIF-MN, and Z@C-MN. (n = 3, **P* < 0.05 and ***P* < 0.01, ns: not significant).


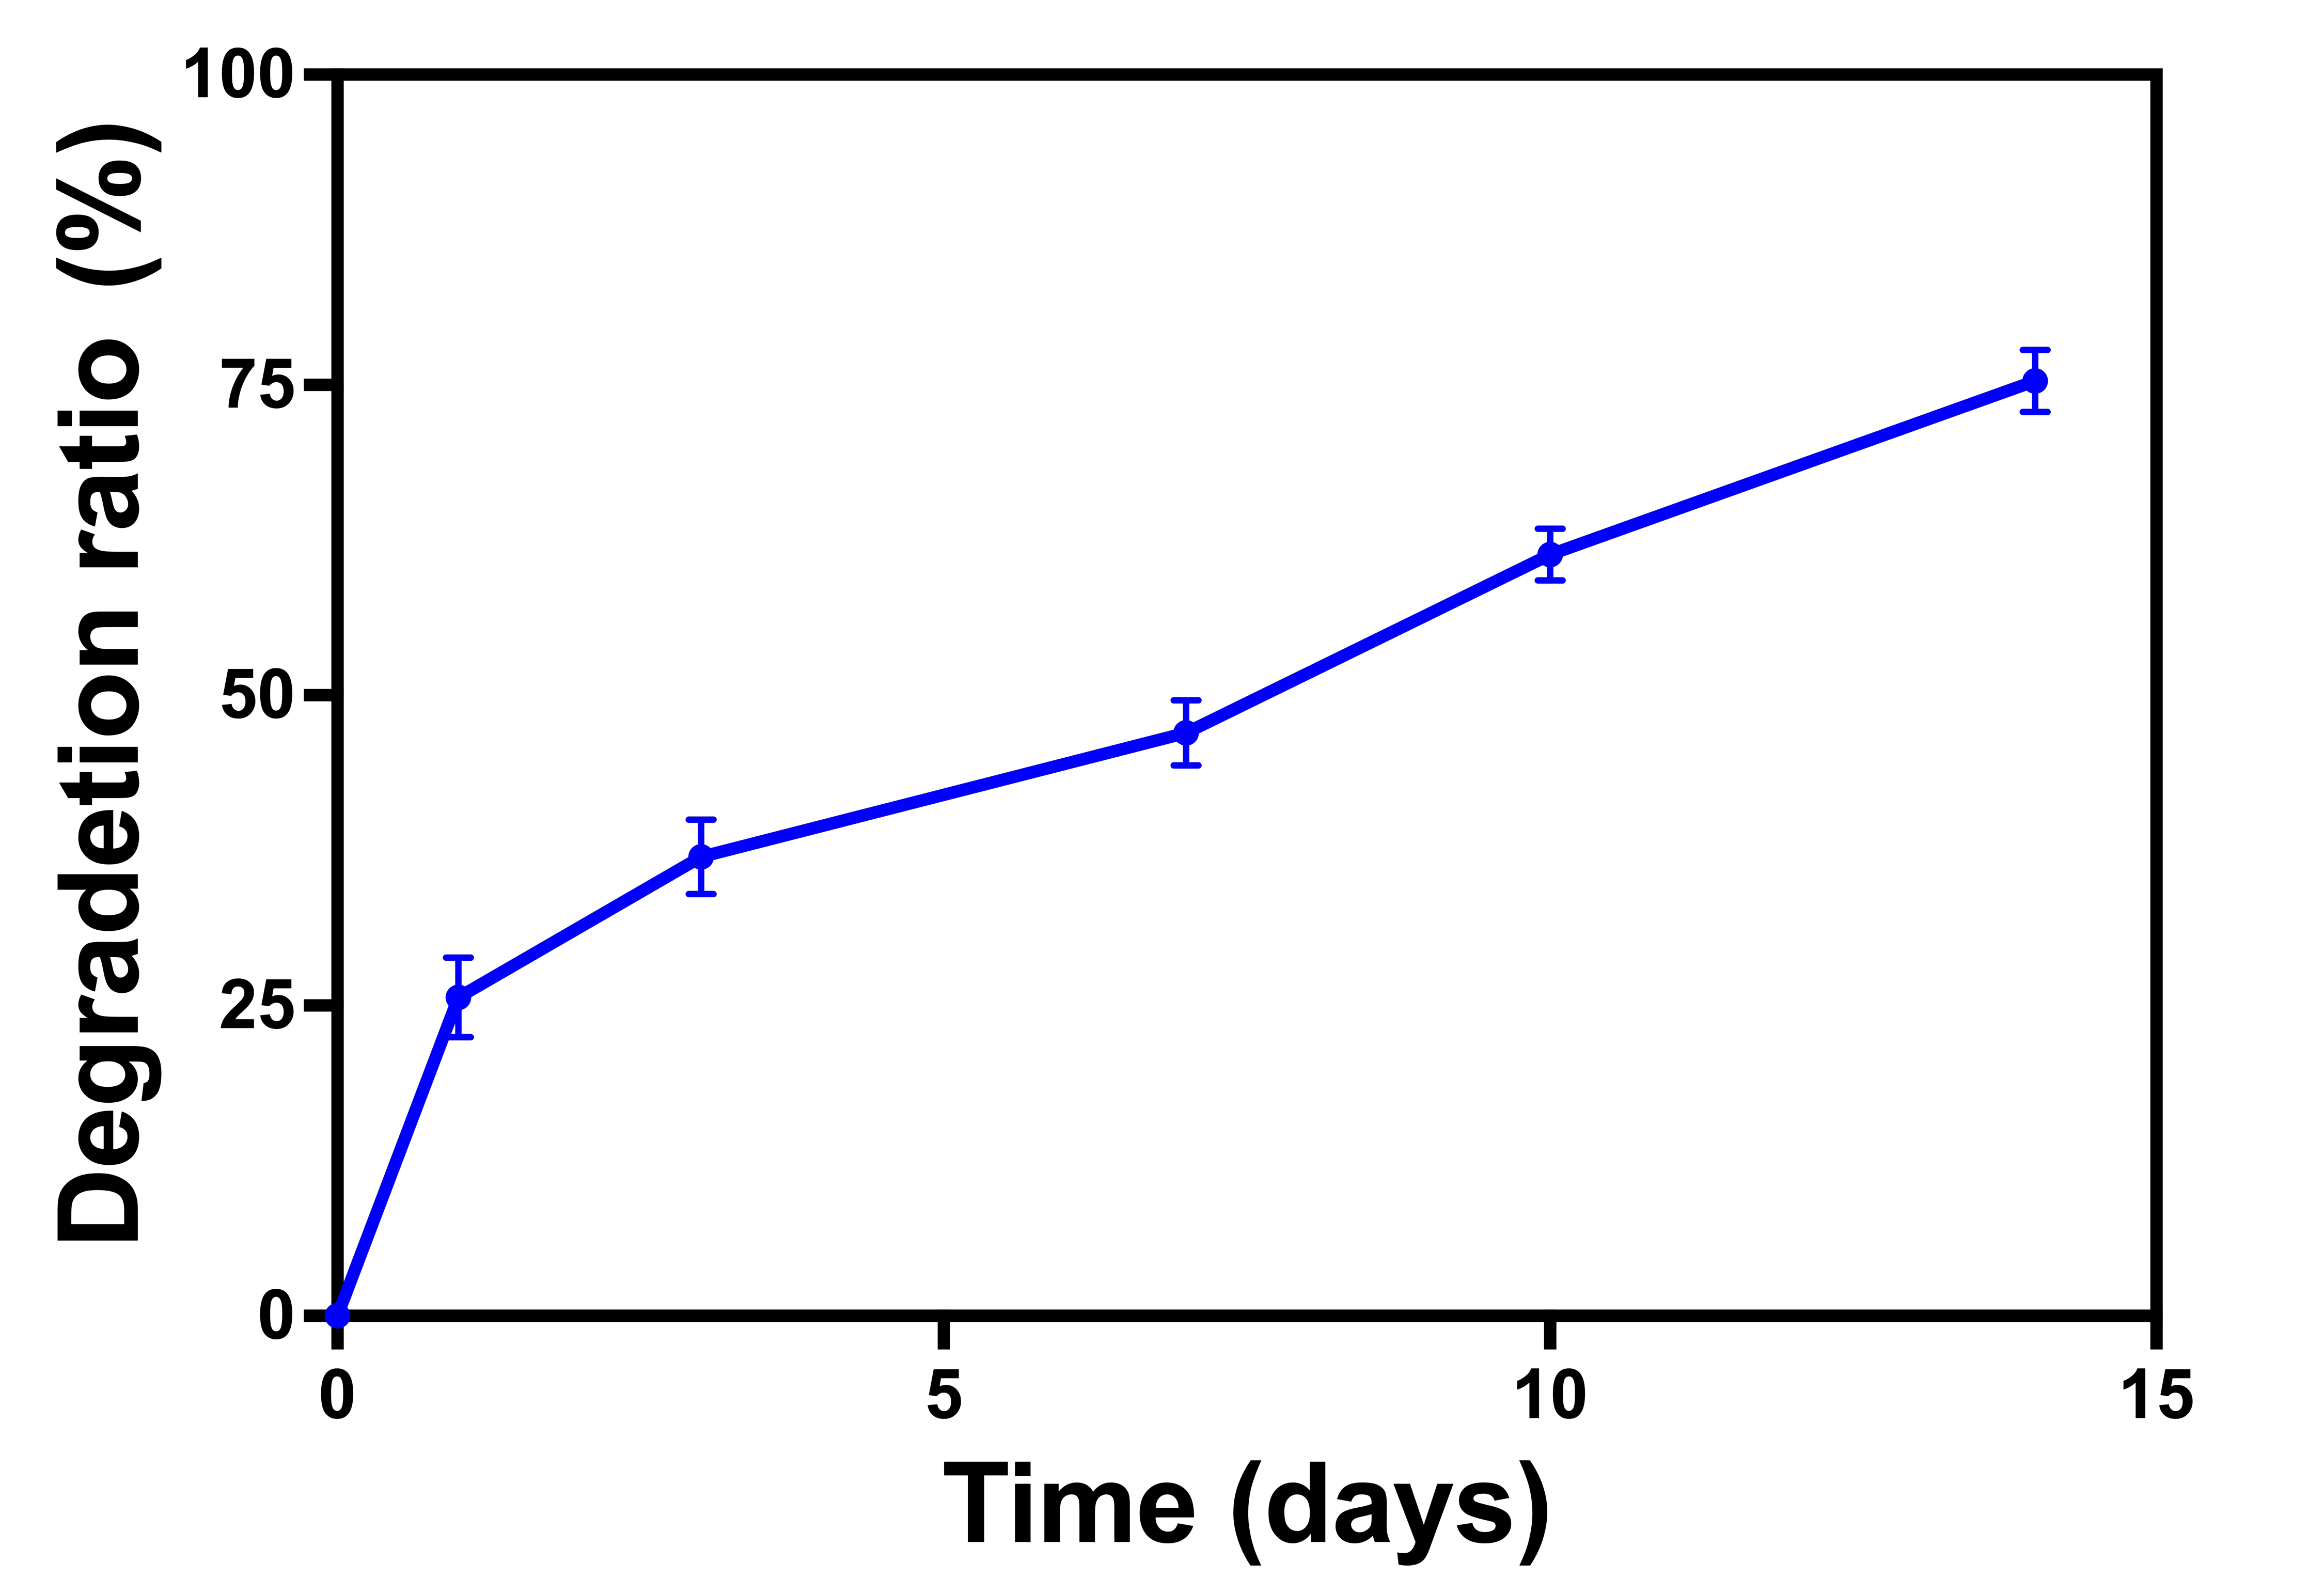


**Fig S9** Degradation ratio of Z@C-MN.


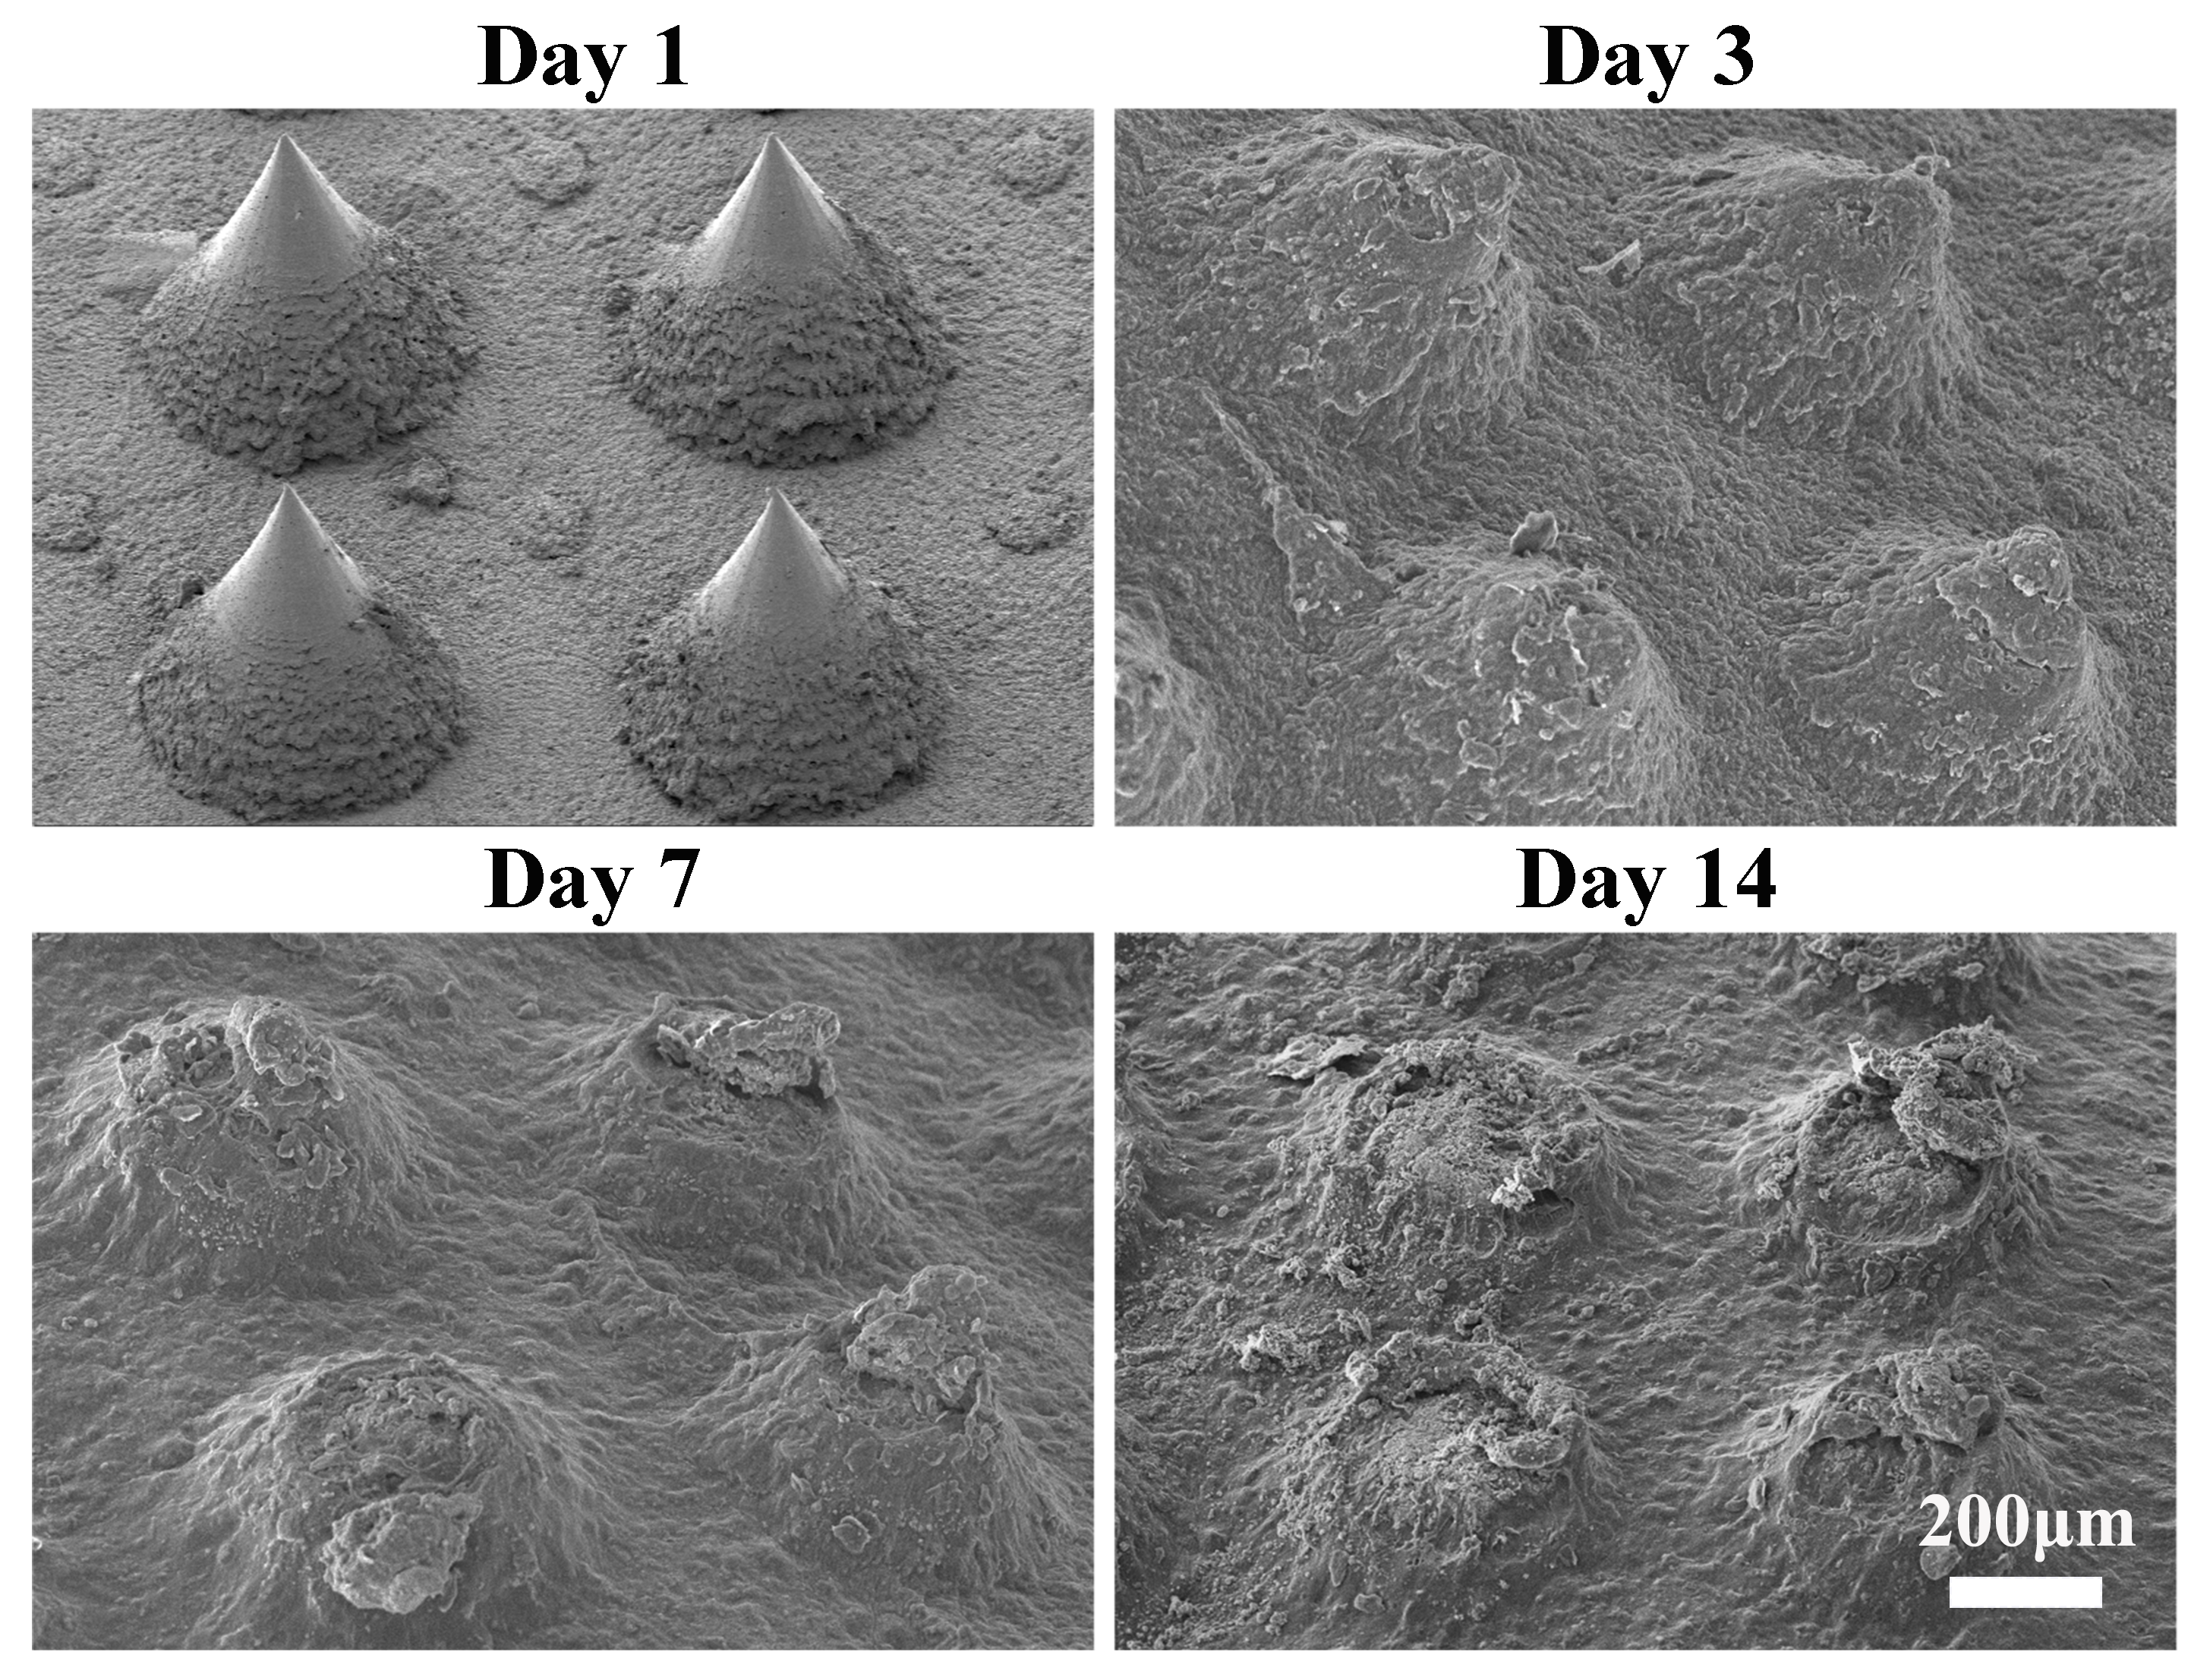


**Fig. S10** SEM images of degraded microneedles in different days.


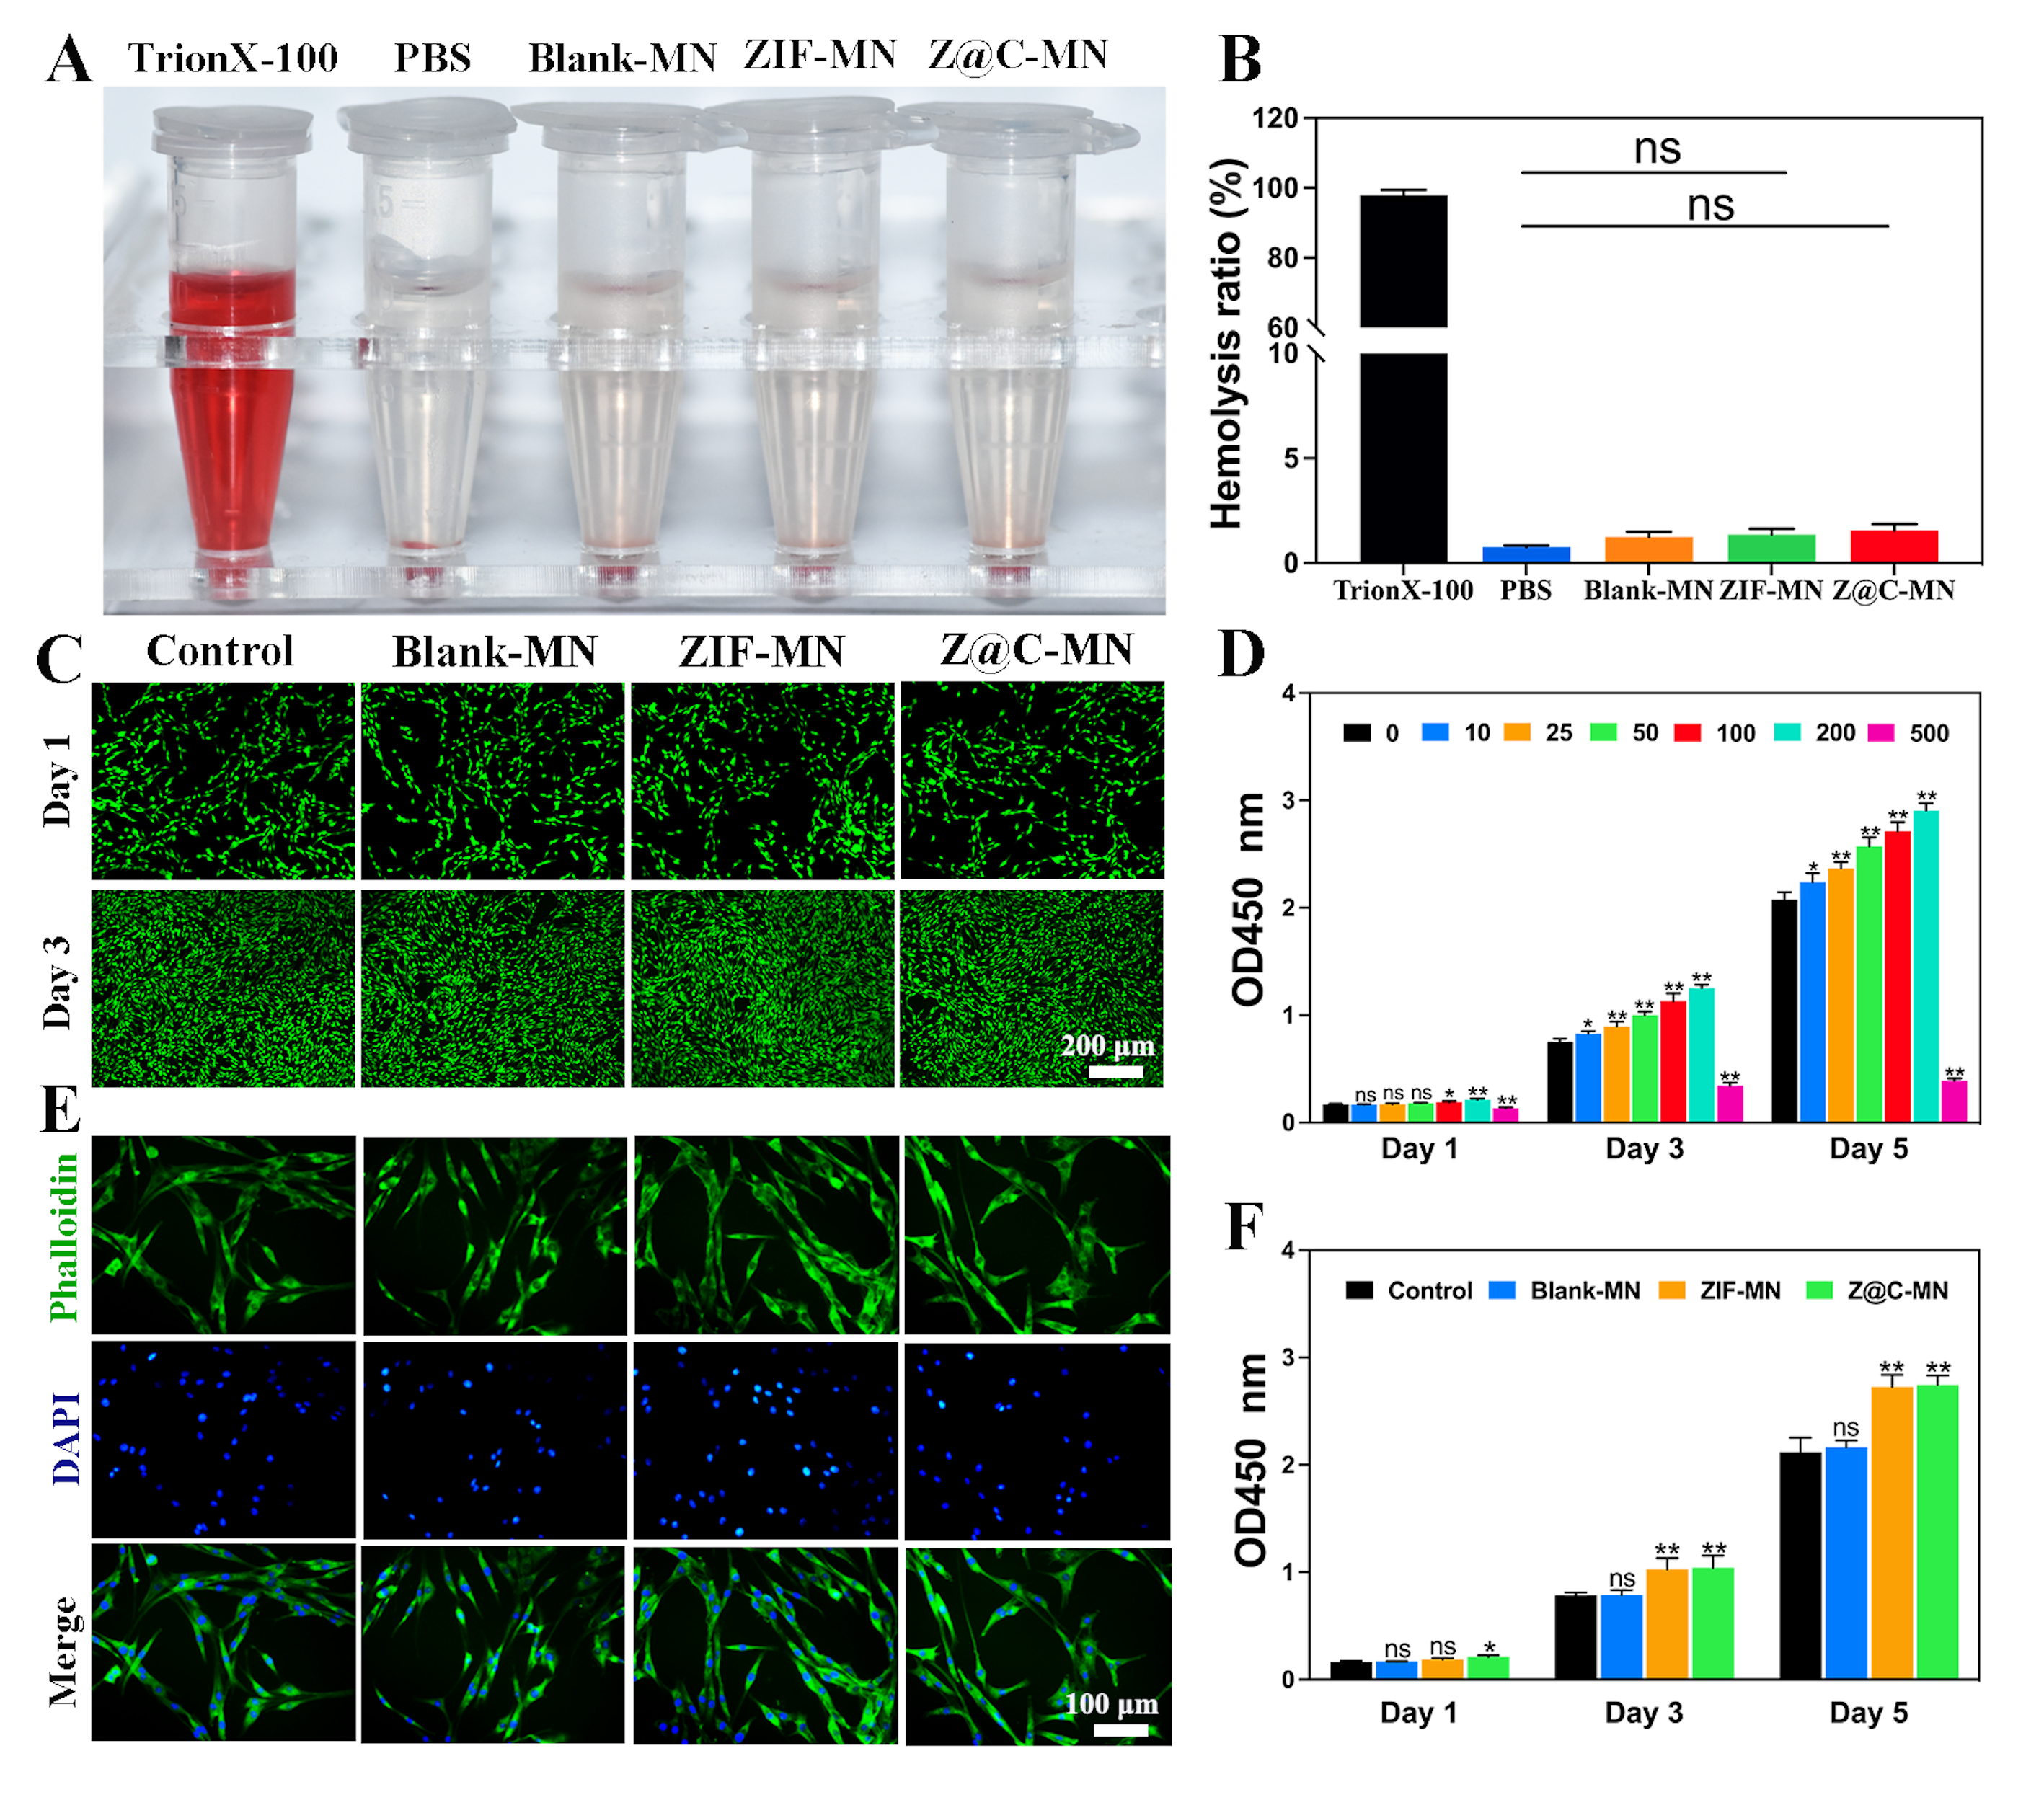


**Fig. S11**In vitro investigation of cytocompatibility and hemocompatibility. (A) Representative photographs of the hemolysis situation of TrionX-100 (positive control), PBS (negative control), and the MN patches for each group. (B) Bar diagram of the hemolysis assay. (C) Live/dead cell viability assay. (D) CCK-8 assay for evaluation of cytotoxicity of different dilution ratios. (E) Cytoskeleton staining. (F) CCK-8 assay for evaluation of cytotoxicity of the MN patches for each group. (n = 3, **P* < 0.05 and ***P* < 0.01, ns: not significant).


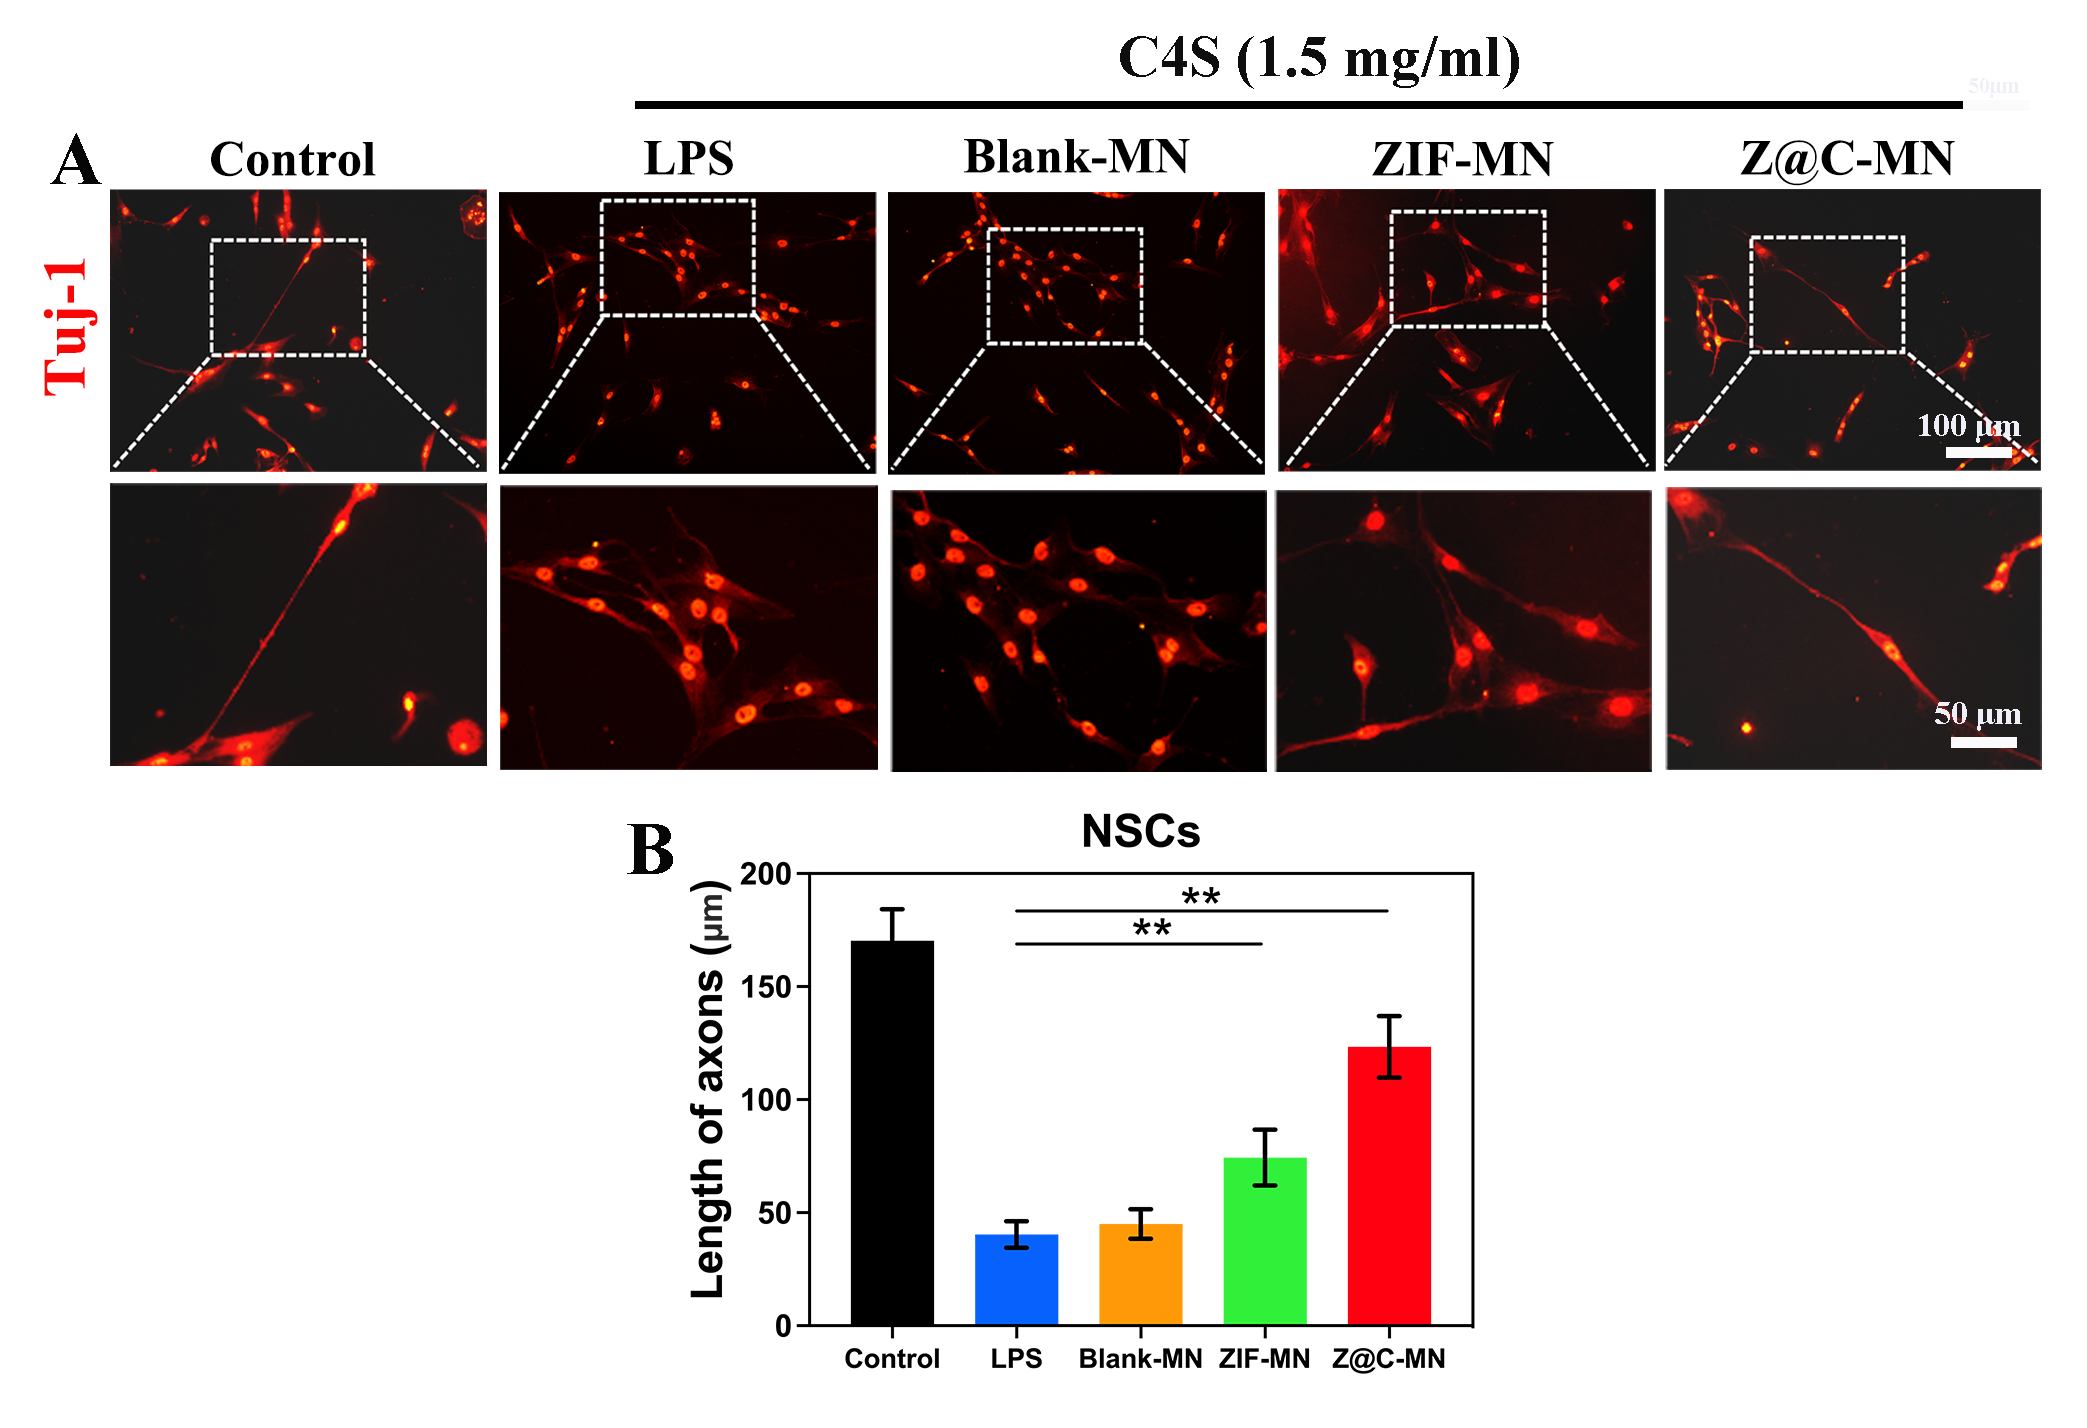


**Fig. S12** The effect of Z@C-MN on the neurite outgrowth in vitro. The immunofluorescence analysis (A) and quantification results (B) of the neurite length of NSCs cells cultured with different groups of MN patch in pathological state of CSPGs. (n = 3, **P* < 0.05 and ***P* < 0.01, ns: not significant).


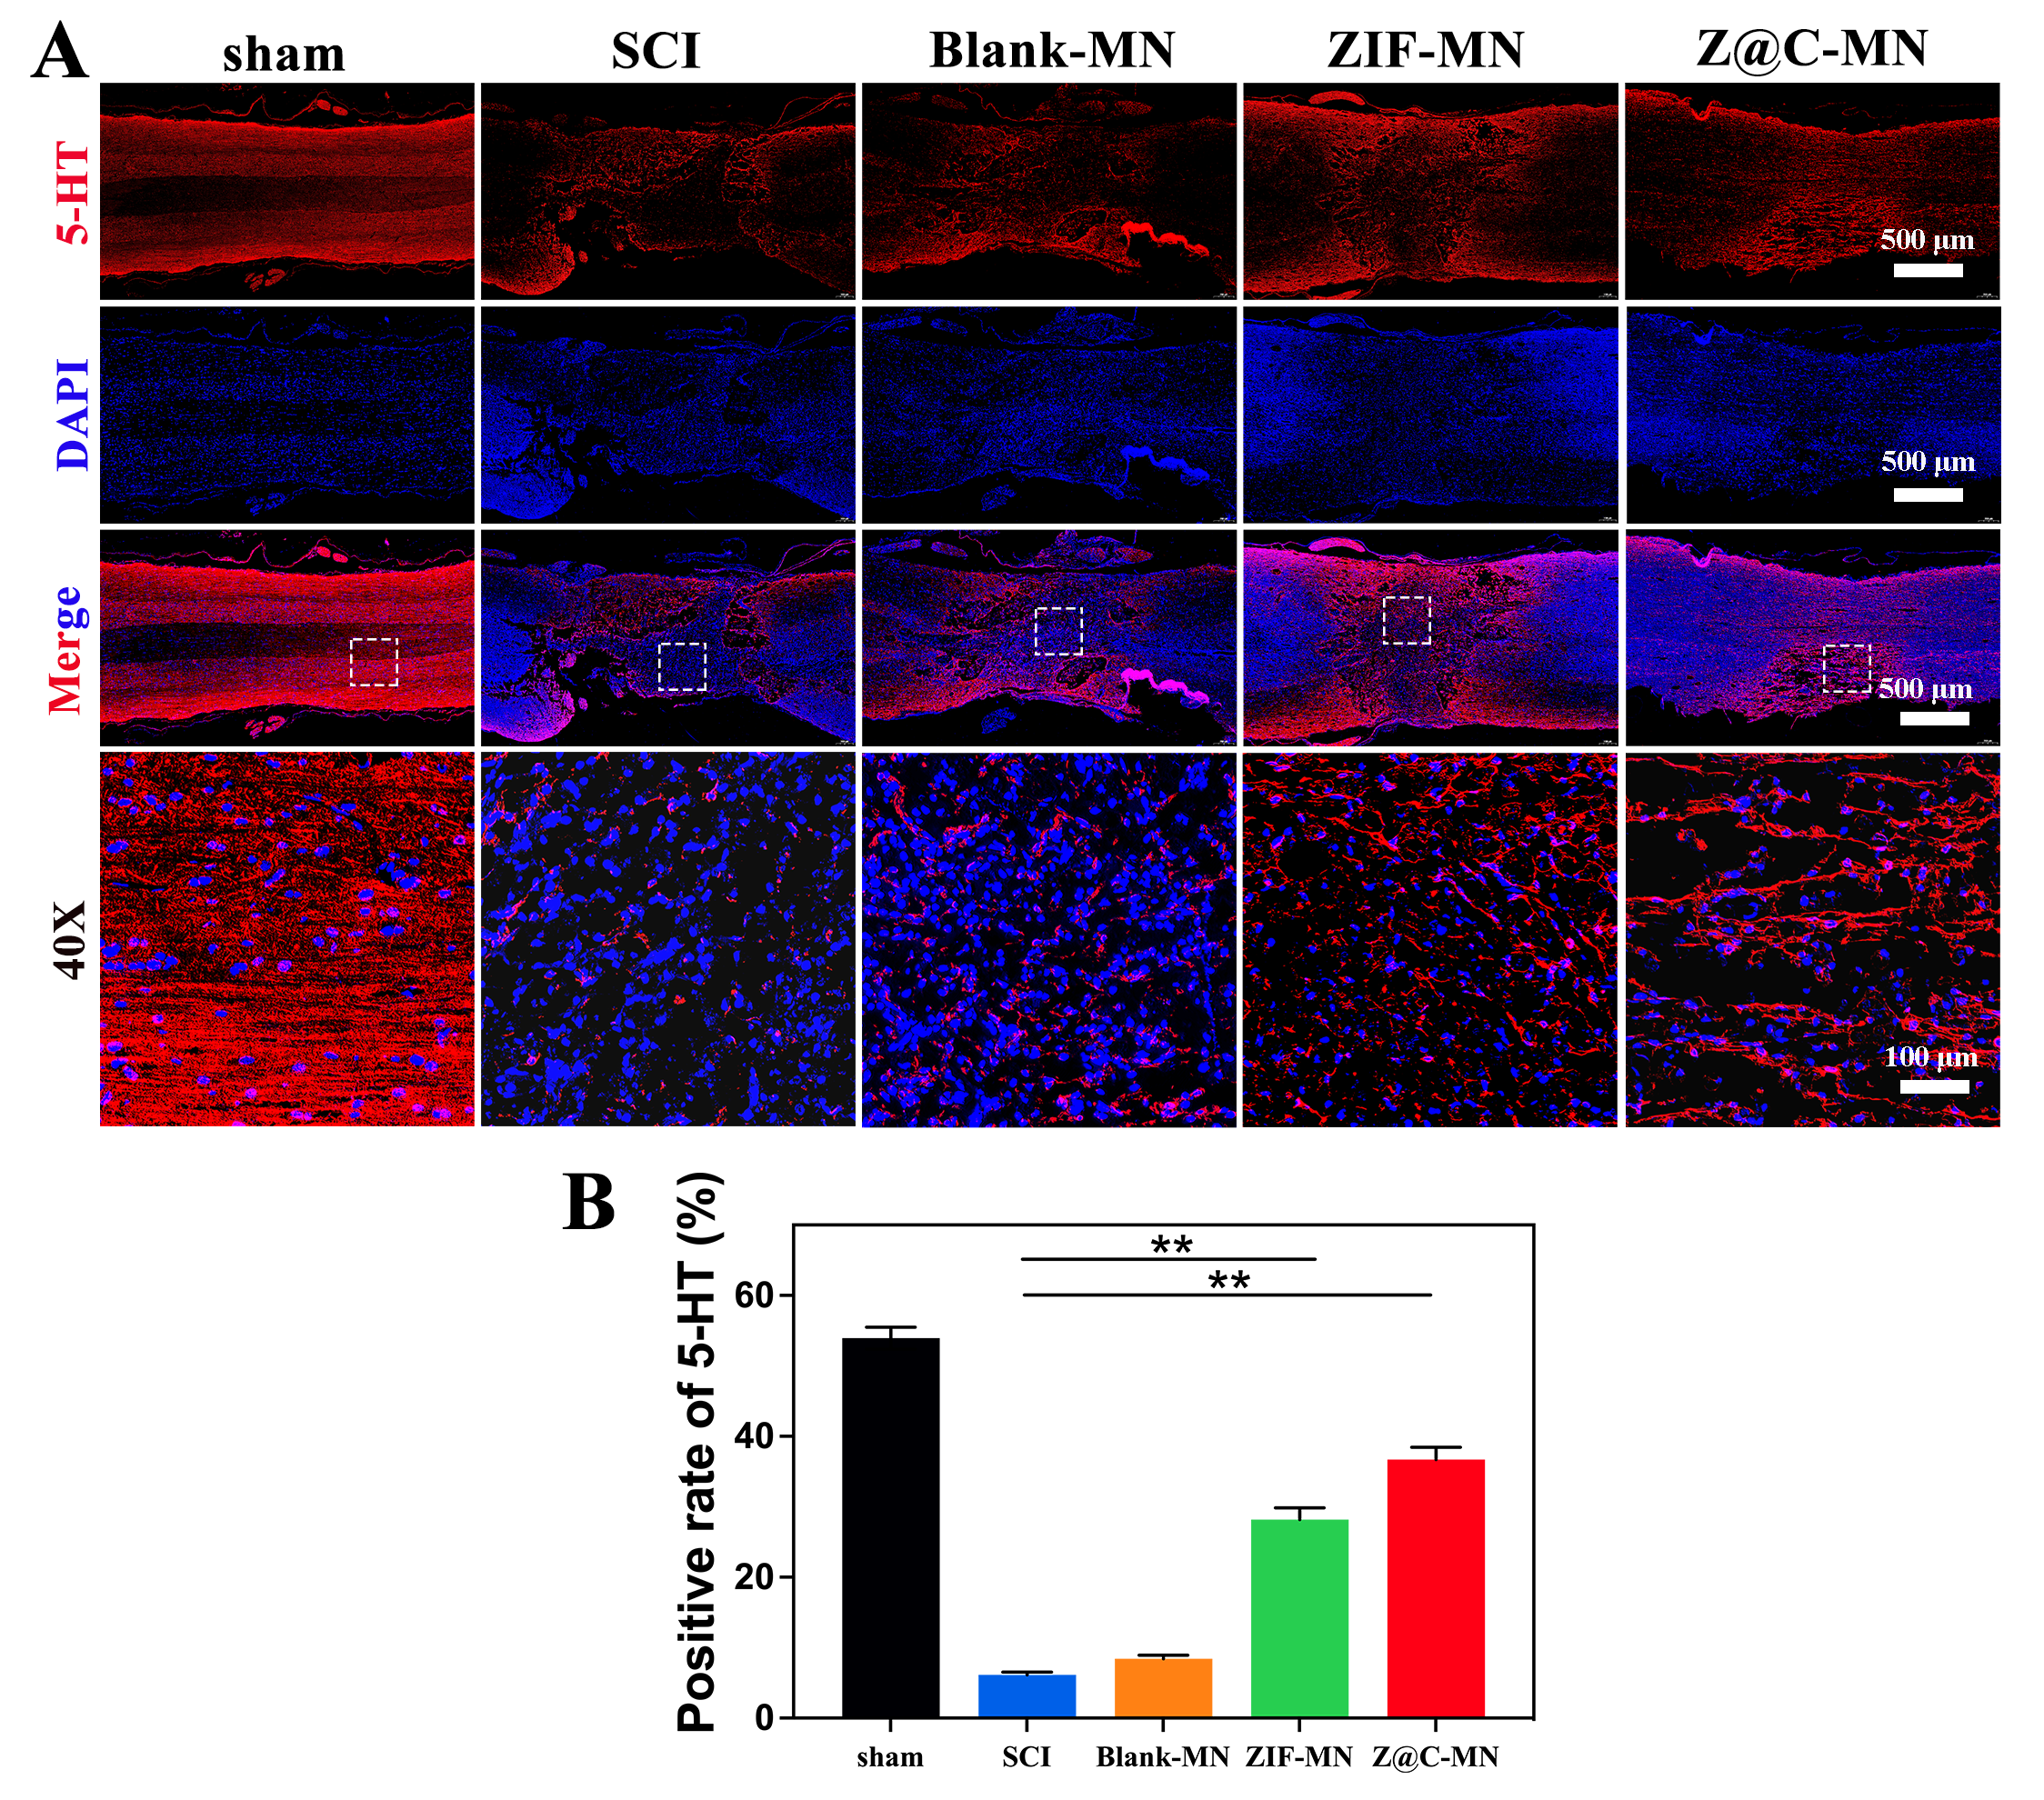


**Fig. S13** 5-HT axon regeneration level of rats in different groups *in vivo*. (A) Representative images of immunofluorescence staining 5-HT of the injury site after SCI. (F) Quantification of the 5-HT levels in representative images. (n = 3, **P* < 0.05 and ***P* < 0.01, ns: not significant).


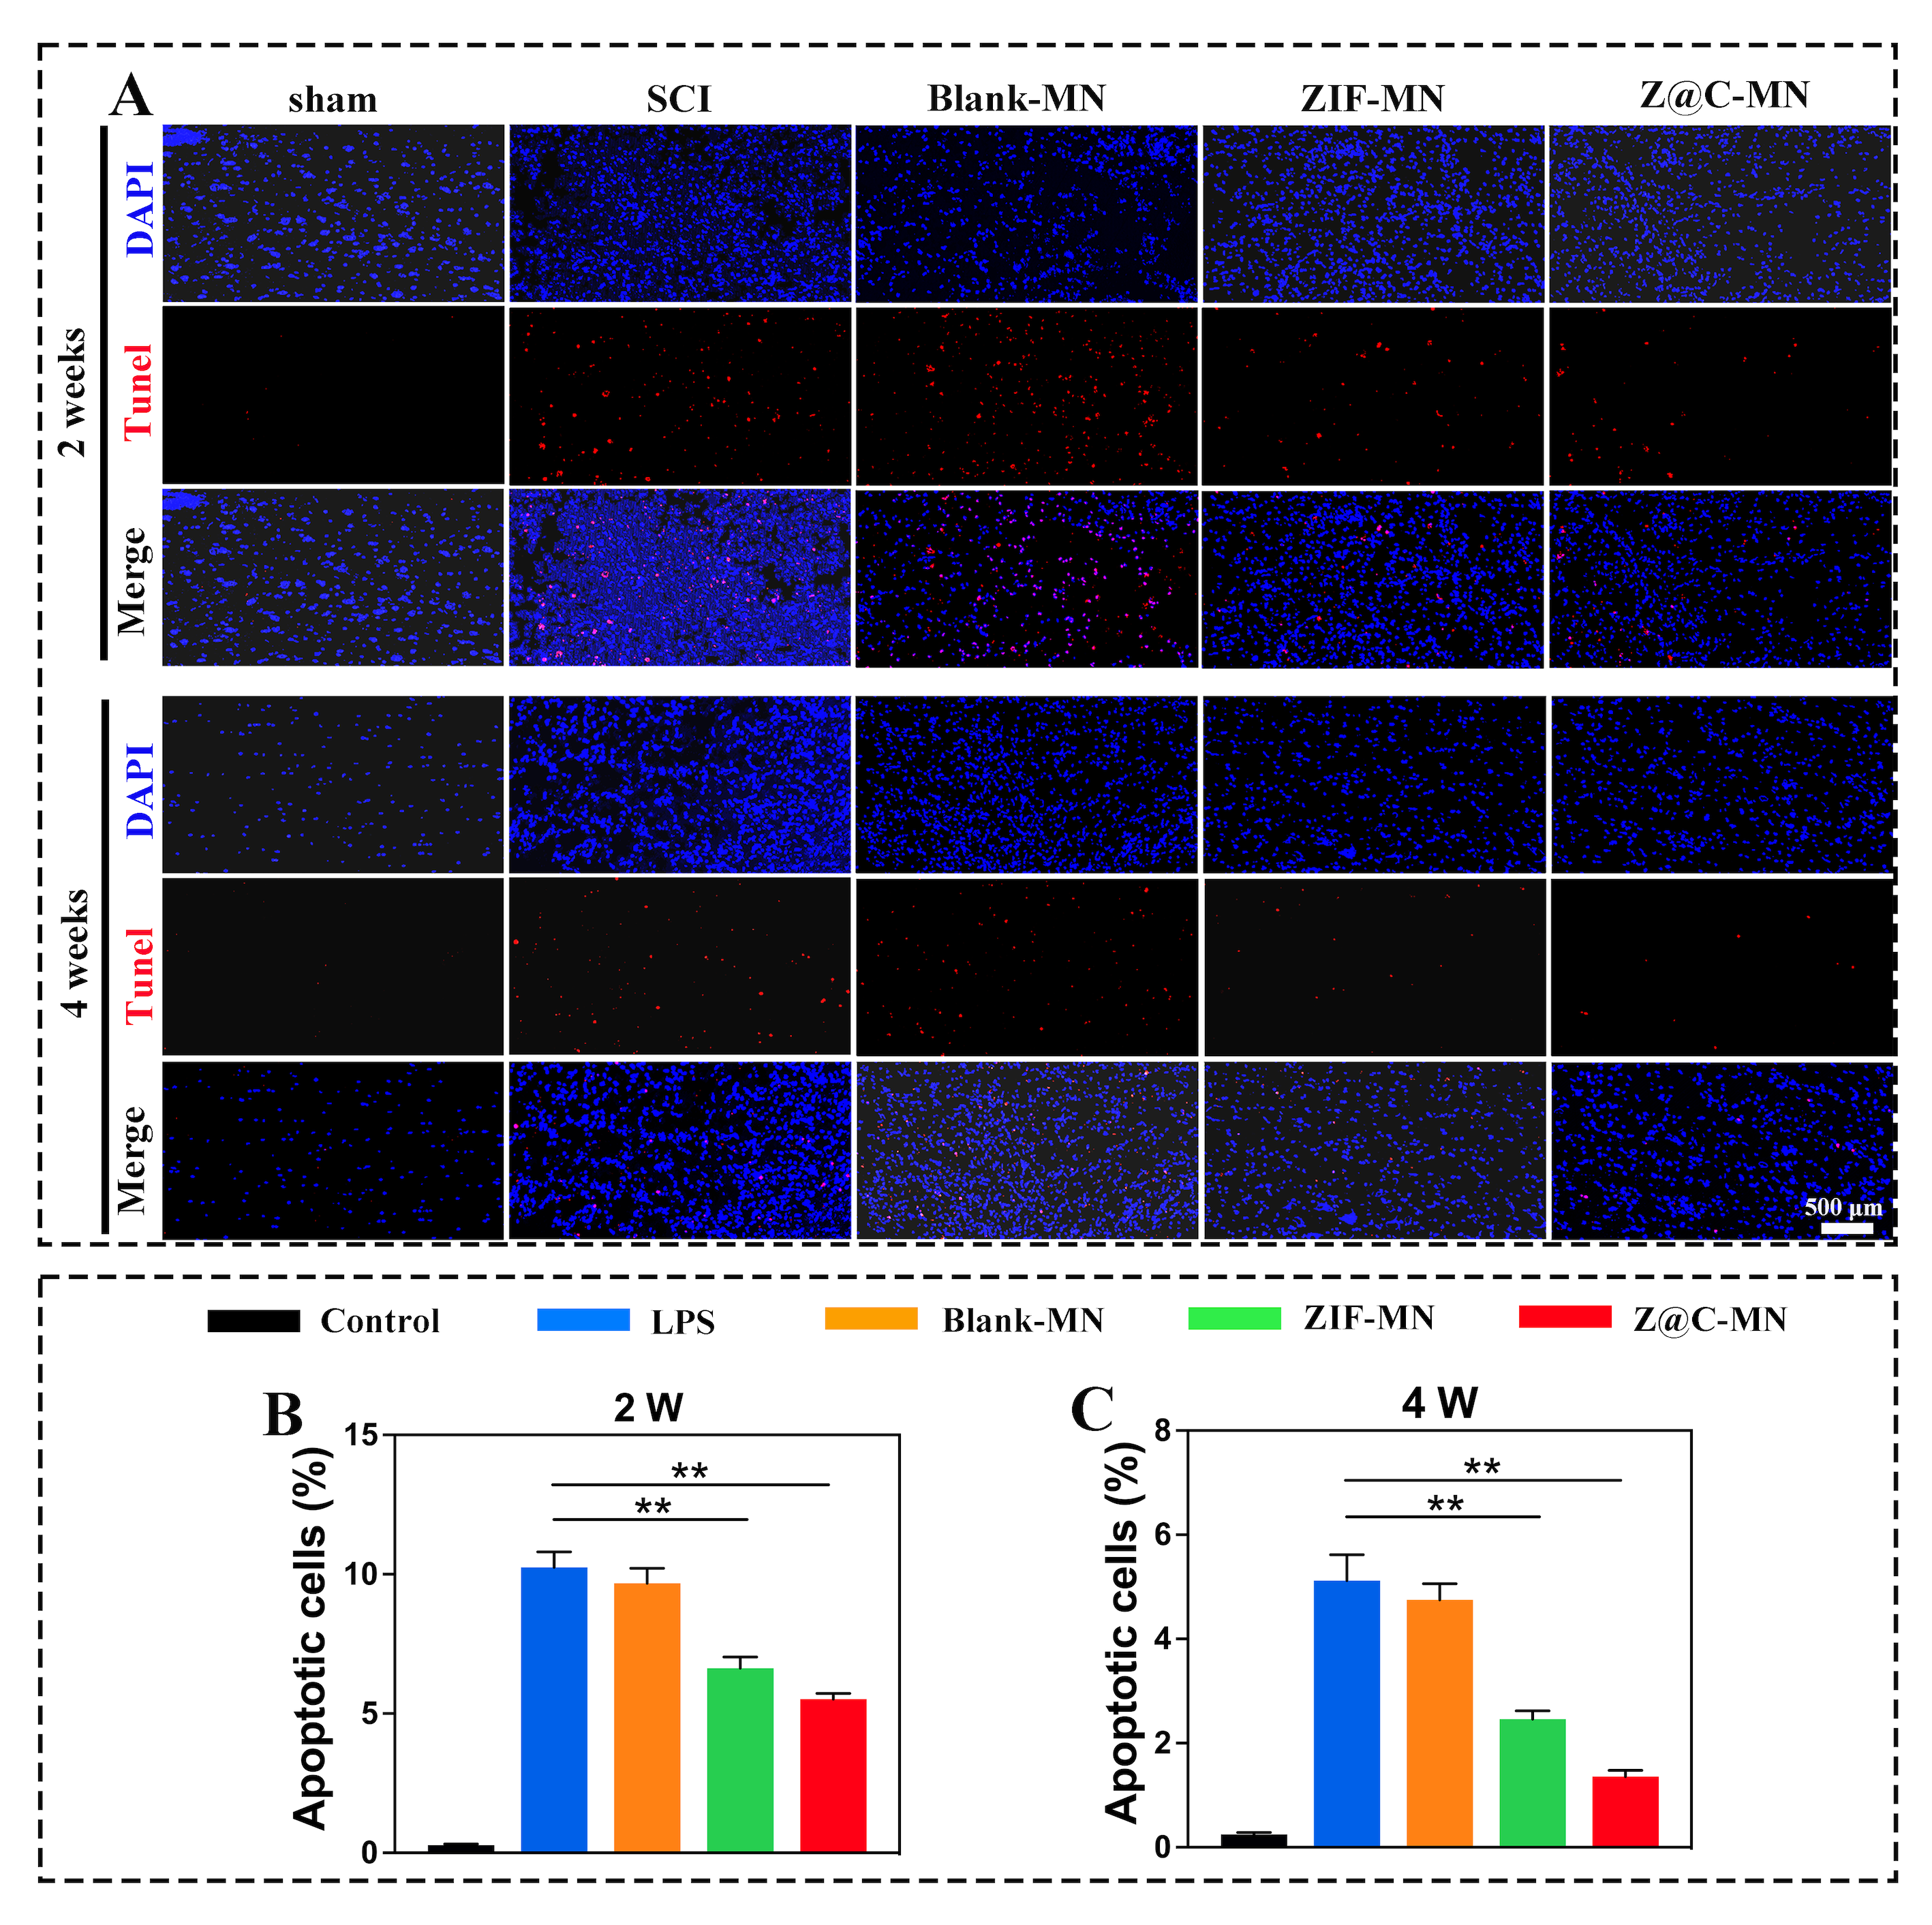


**Fig. S14** TUNEL staining of the spinal cord longitudinal sections from each group at 2 and 4 weeks post-injury. The TUNEL staining analysis (A) and quantification results (B) of the spinal cord longitudinal sections from each group at 2 and 4 weeks post-injury. (n = 3, **P* < 0.05 and ***P* < 0.01, ns: not significant).


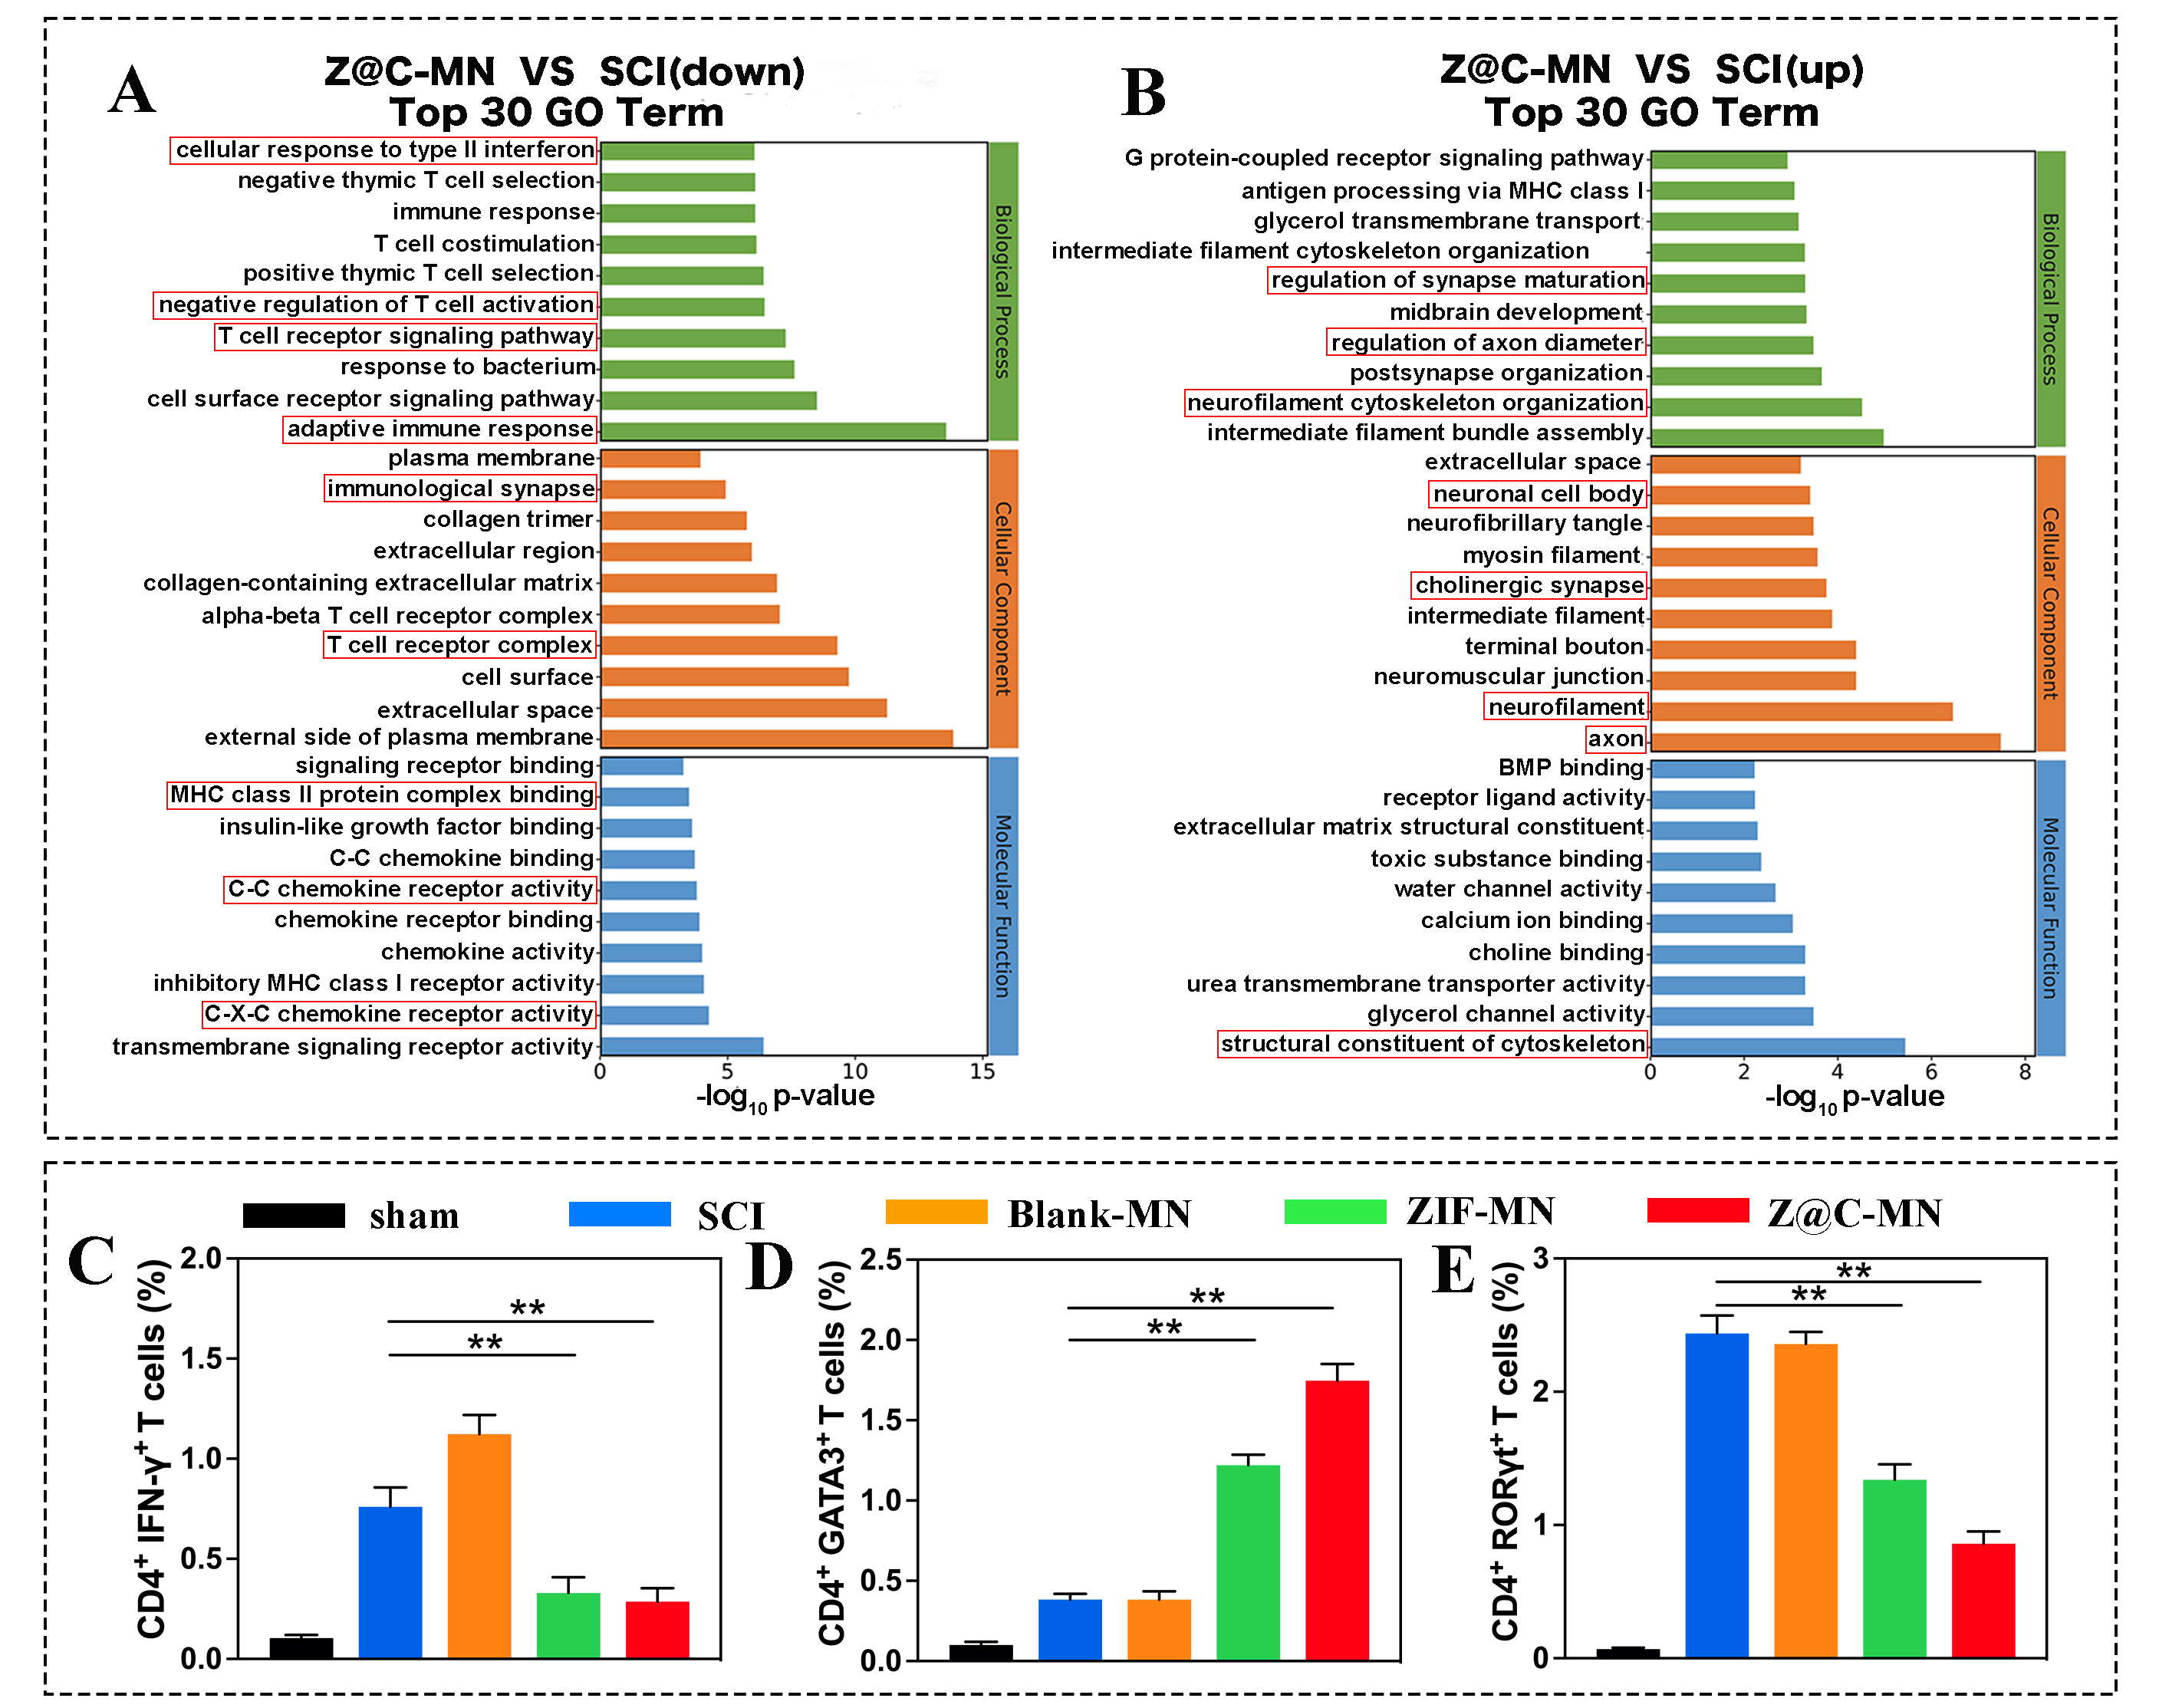


**Fig. S15** Z@C-MN Transcriptome sequencing for regulating immune regulation and nerve regeneration in SCI. (A-B) GO enrichment analysis of DEGs. The bar chart depicts the proportions of different subtype cells to CD4+ T cells in different groups. Th1 cells (C), Th2 cells (D), and Th17 cells (E). (n = 3, **P* < 0.05 and ***P* < 0.01, ns: not significant).


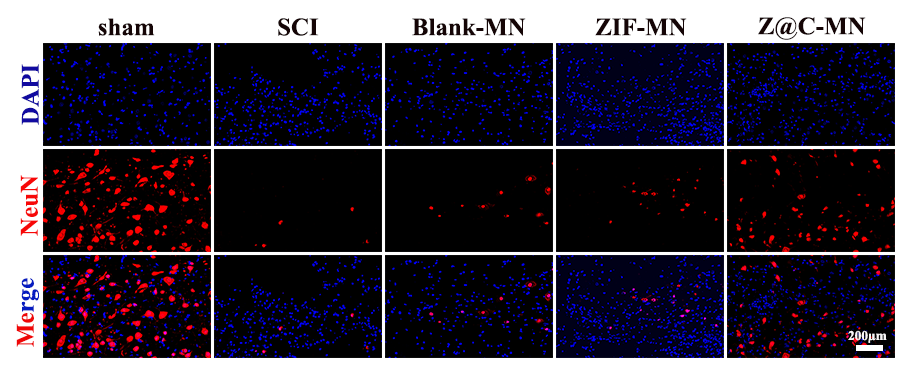


**Fig. S16** The expression levels of neuronal nucleoprotein (NeuN) in different groups of rats.


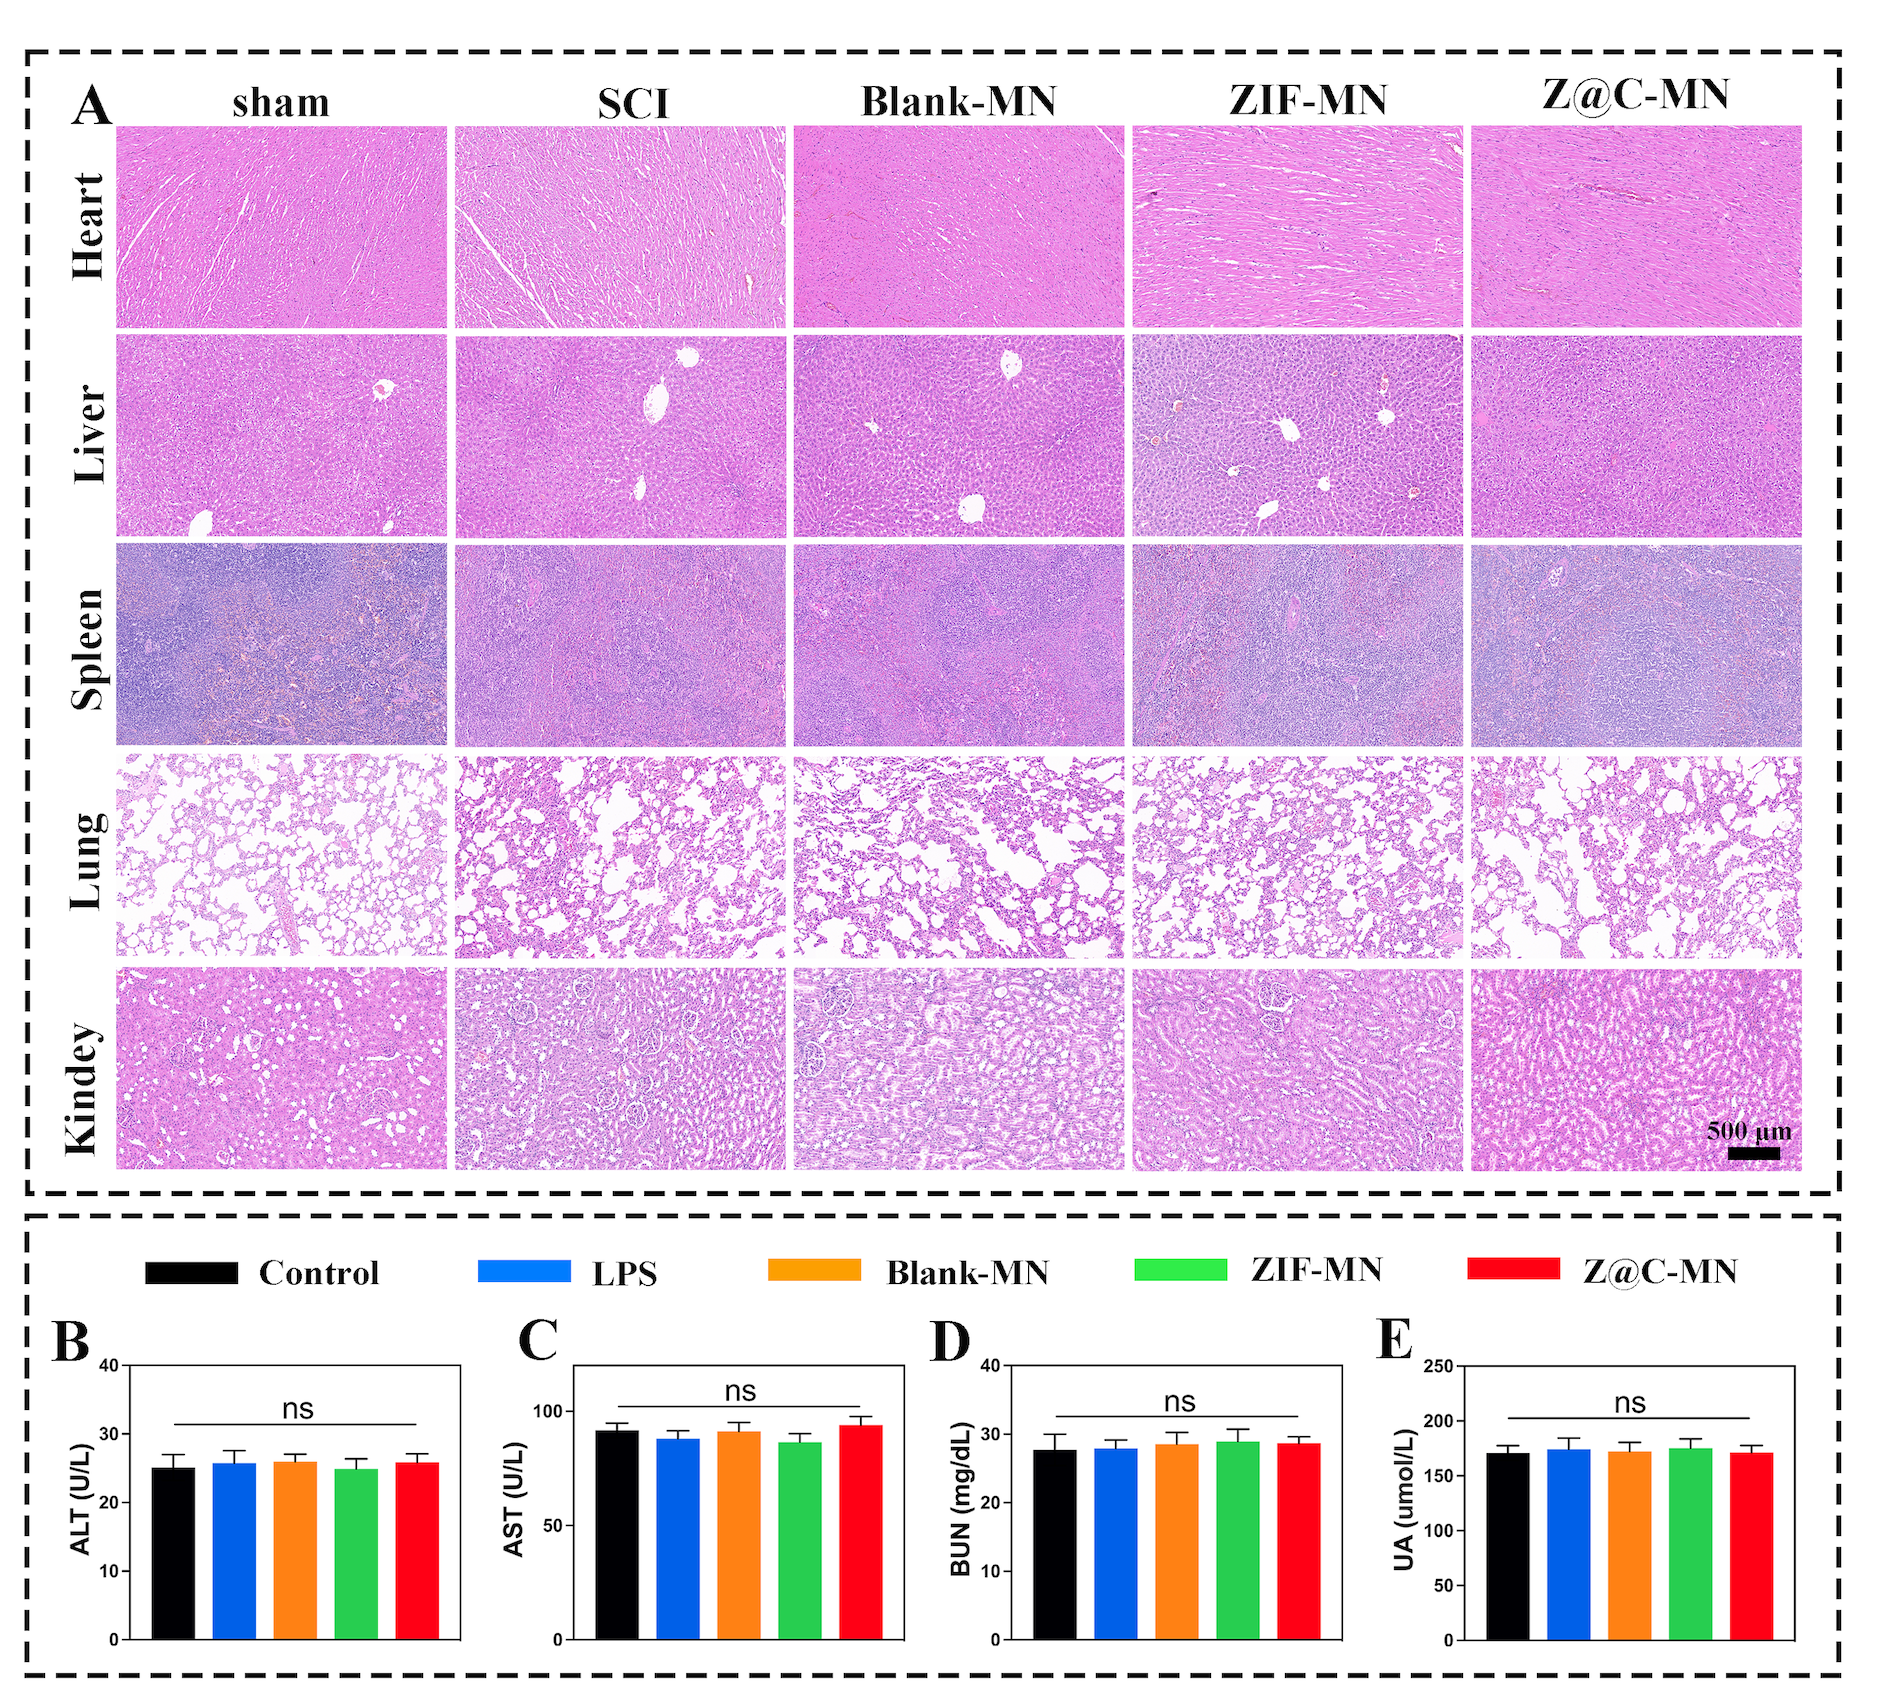


**Fig. S17** The biocompatibility of different groups in vivo. (A) H&E staining of major organs, which were collected on 4 weeks post-treatment. (B-E) The level assay of plasma ALT, AST, UA, and BUN. (n = 3, **P* < 0.05 and ***P* < 0.01, ns: not significant).


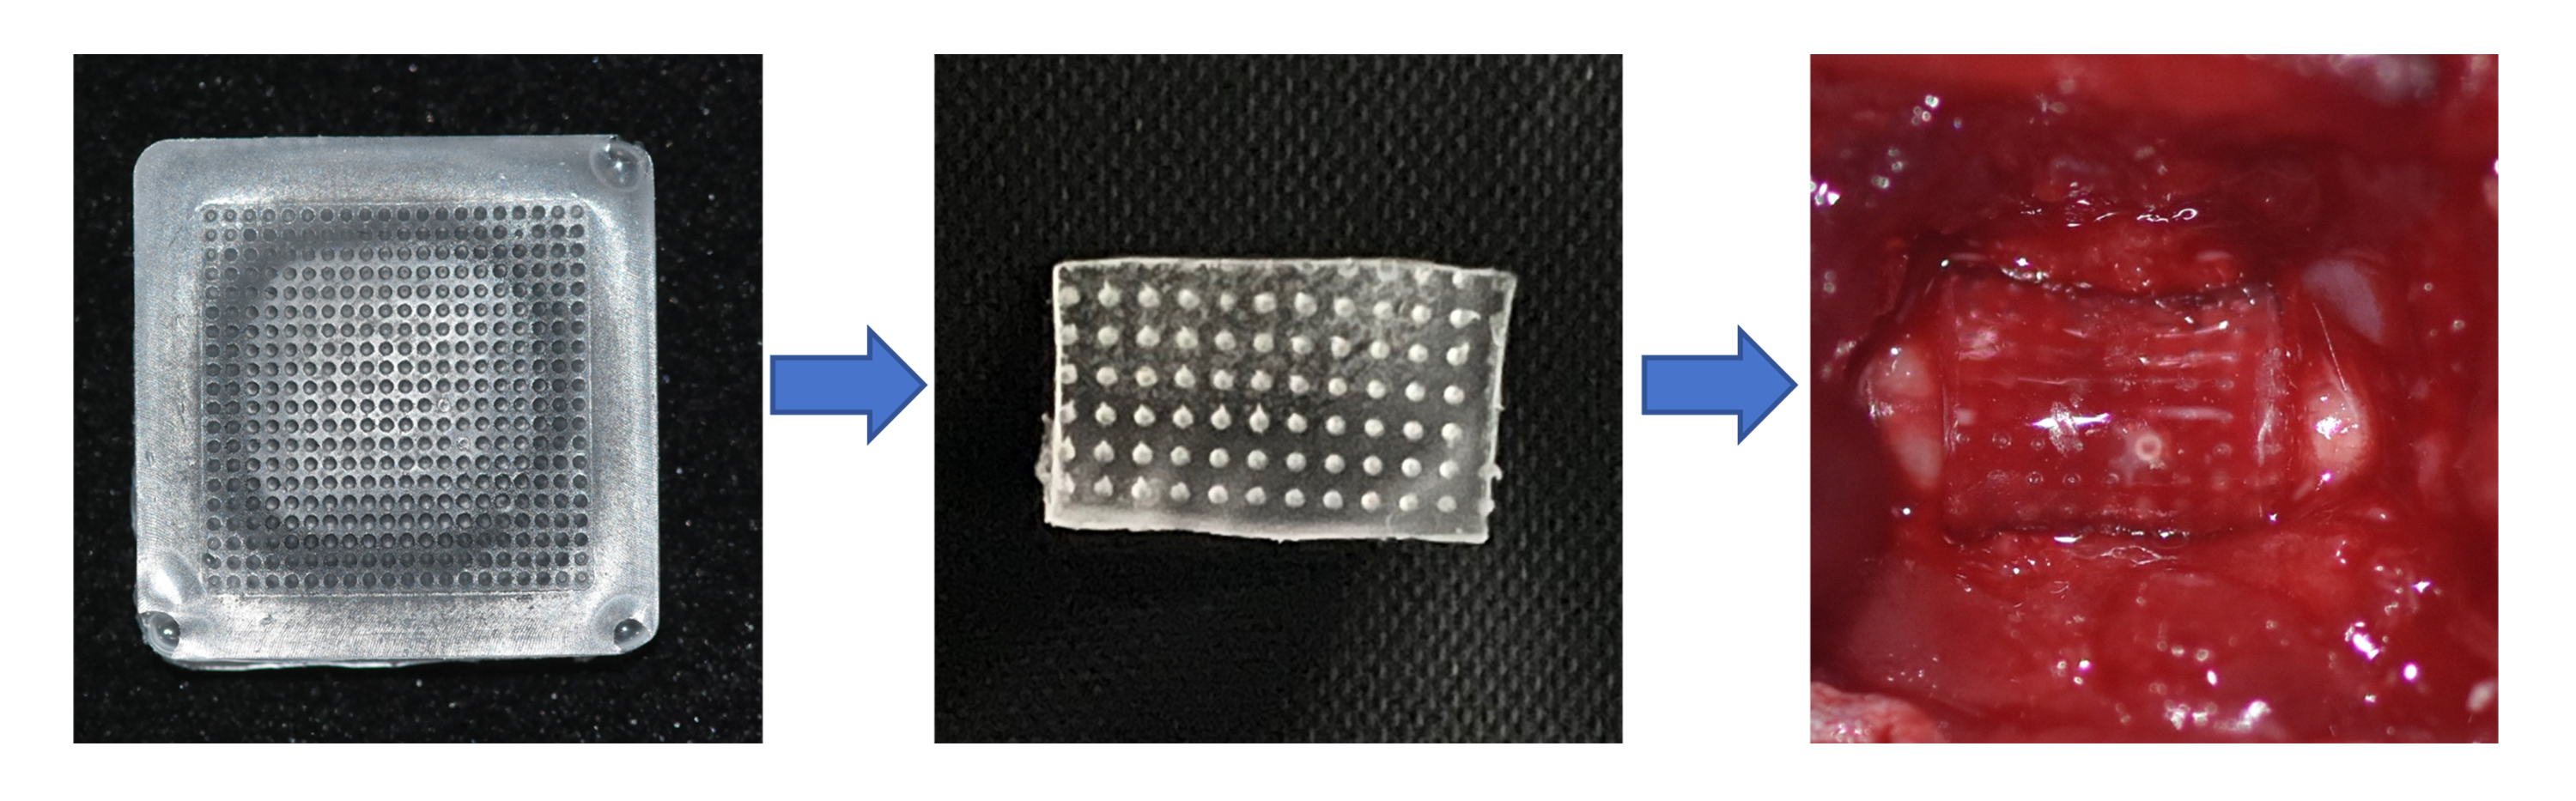


**Fig. S18** Z@C-MN flowchart of implant injury area.

**Table S1** Primers used in the RT-qPCR of RAW264.7 cells.

| **Gene** | **Direction** | **Sequences** |
| --- | --- | --- |
| *IL-1β* | Forward | 5′-ACTCATTGTGGCTGTGGAGA-3′ |
| Reverse | 5′-TTGTTCATCTCGGAGCCTGT-3′ |
| *iNOS* | Forward | 5′-CAGCCTGTGAGACCTTTGATGT-3′ |
| Reverse | 5′-GTTGCATTGGAAGTGAAGCGTT-3′ |
| *TNF-β* | Forward | 5′-GGATACCAACTATTGCTTCAGCTCC-3′ |
| Reverse | 5′-AGGCTCCAAATATAGGGGCAGGGTC-3′ |
| *Arg-1* | Forward | 5′-CAACACTCCGCTGACAACCAG-3′ |
| Reverse | 5′-TGTACACGATGTCCTTGGCAGA-3′ |
| *β-actin* | Forward | 5′-GTGACGTTGACATCCGTAAAGA-3′ |
| Reverse | 5′-GTAACAGTCCGCCTAGAAGCAC-3′ |
